# Supplementary material for: Trisyl-based multidentate ligands: synthesis and their transition-metal complexes
Source: Royal Society of Chemistry journal article supplement (doi:10.1039/d2dt00049k), 2022-01-01
Supplement: d2dt00049k1.pdf [file d2dt00049k1.pdf]

## Cover Page for Supporting Information

### Trisyl-based multidentate ligands: synthesis and their transition-metal complexes

**Authors:** Zhu-Bao Yin, Junnian Wei\* and Zhenfeng Xi

#### Contents

|                                                                                                 |     |
|-------------------------------------------------------------------------------------------------|-----|
| 1) Experimental procedures and characterization data for <b>1-2</b> .....                       | S2  |
| 2) Copies of NMR Spectra .....                                                                  | S10 |
| 3) X-ray Crystallographic Studies for <b>3a'</b> , <b>3b-d</b> , <b>4-8</b> , <b>S1-3</b> ..... | S26 |
| 4) IR Spectra for <b>3a-d</b> , <b>4-8</b> .....                                                | S51 |
| 5) References.....                                                                              | S55 |

## 1) Experimental procedures and characterization data for 1-2

### Preparation of (Me<sub>3</sub>Si)<sub>2</sub>CH(SiMe<sub>2</sub>CH<sub>2</sub>Cl) **1**

To a solution of (Me<sub>3</sub>Si)<sub>2</sub>CHBr (28 g, 117 mmol) in dry Et<sub>2</sub>O (230 mL) was added dropwise a solution of <sup>n</sup>BuLi (73 mL, 1.6 M solution in hexanes, 117 mmol) at -78 °C under nitrogen. The mixture was stirred for additional 30 min at -78 °C. ClSiMe<sub>2</sub>CH<sub>2</sub>Cl (16.7 g, 117 mmol) was then added dropwise at -78 °C. The reaction mixture was stirred for another 24 h at room temperature. The solution was filtered through Celite, and the solvent was removed and dried *in vacuo* to give light yellow liquid. Distillation under reduced pressure at 120 °C under 2.5 mbar, obtaining a colorless liquid compound **1** (25 g), yield 80%. <sup>1</sup>H NMR (400 MHz, CDCl<sub>3</sub>) δ -0.51 (s, 1H, CH), 0.12 (s, 18H, SiMe<sub>3</sub>), 0.23 (s, 6H, SiMe<sub>2</sub>), 2.83 (s, 2H, CH<sub>2</sub>). <sup>13</sup>C NMR (101 MHz, CDCl<sub>3</sub>) δ 0.0 (SiMe<sub>3</sub>), 1.7 (SiMe<sub>2</sub>), 3.6 (CH), 33.8 (CH<sub>2</sub>). HRMS (EI-MS): calculated m/z for C<sub>9</sub>H<sub>25</sub>Si<sub>3</sub> [M-CH<sub>2</sub>Cl]: 217.12641, found: 217.12567.

### Preparation of **2a**

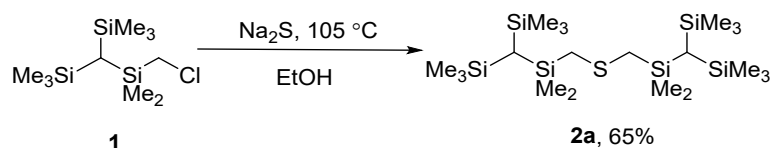

The reaction of **1** (5.34 g, 20 mmol) and Na<sub>2</sub>S (780 mg, 10 mmol) was processed at 105 °C for 12 h. The unreacted compound **1** is removed by distillation at 200 °C/2.5 mbar. The residue was then purified by column chromatography over silica gel (eluent: PE, monitored by TLC under KMnO<sub>4</sub>) to afford 3.24 g (65%) of **2a** as a pale colorless oil. <sup>1</sup>H NMR (400 MHz, CDCl<sub>3</sub>) δ -0.55 (s, 2H, CH), 0.12 (s, 36H, SiMe<sub>3</sub>), 0.19 (s, 12H, SiMe<sub>2</sub>), 1.87 (s, 4H, CH<sub>2</sub>). <sup>13</sup>C NMR (101 MHz, CDCl<sub>3</sub>) δ 0.0 (SiMe<sub>3</sub>), 1.1 (SiMe<sub>2</sub>), 2.1 (CH), 25.1 (CH<sub>2</sub>). HRMS (ESI) calcd for C<sub>20</sub>H<sub>55</sub>SSi<sub>6</sub> [M+H]<sup>+</sup> 495.26401, found: 495.26261.

### Preparation of **2b**

#### Step 1: Preparation of (Me<sub>3</sub>Si)<sub>2</sub>CH(SiMe<sub>2</sub>CH<sub>2</sub>NPhth) **A**

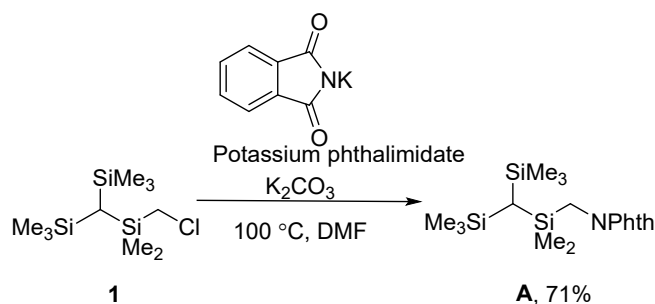

**1** (2.0 g, 7.5 mmol) was added to a stirring mixture of potassium phthalimide (1.7 g, 9.4 mol) and anhydrous  $\text{K}_2\text{CO}_3$  (207 mg, 1.5 mmol) in anhydrous DMF (15 mL). The mixture was brought to 100°C and stirred for 12 h. After cooling to room temperature,  $\text{H}_2\text{O}$  was added, extracted by diethyl ether. The ethereal layer was separated from the aqueous layer and washed with brine. The organic layer was dried with  $\text{Na}_2\text{SO}_4$  and concentrated under reduced pressure. The residue was purified by column chromatography over silica gel using PE : EA = 10:1 as eluent to afford the pure  $(\text{Me}_3\text{Si})_2\text{CH}(\text{SiMe}_2\text{CH}_2\text{NPhth})$  **A** as white solid (2.0 g, 71% yield).  $^1\text{H}$  NMR (500 MHz,  $\text{CDCl}_3$ )  $\delta$  -0.46 (s, 1H, CH), 0.15 (s, 6H,  $\text{SiMe}_2$ ), 0.16 (s, 18H,  $\text{SiMe}_3$ ), 3.26 (s, 2H,  $\text{CH}_2$ ), 7.67 (d,  $J$  = 4.1 Hz, 2H, Phth), 7.80 (d,  $J$  = 3.2 Hz, 2H, Phth).  $^{13}\text{C}$  NMR (126 MHz,  $\text{CDCl}_3$ )  $\delta$  0.0 ( $\text{SiMe}_3$ ), 2.0 ( $\text{SiMe}_2$ ), 2.5 (CH), 30.4 ( $\text{CH}_2$ ), 122.1 (Ar), 131.5 (Ar), 132.8 (Ar), 167.8 (CO). HRMS (ESI) calcd for  $\text{C}_{18}\text{H}_{32}\text{NO}_2\text{Si}_3$   $[\text{M}+\text{H}]^+$  378.17408, found: 378.17275.

## Step 2: Preparation of $(\text{Me}_3\text{Si})_2\text{CH}(\text{SiMe}_2\text{CH}_2\text{NH}_2)$

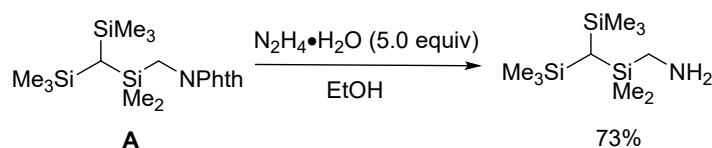

$(\text{Me}_3\text{Si})_2\text{CH}(\text{SiMe}_2\text{CH}_2\text{NPhth})$  **A** (15.13 g, 40 mmol) was dissolved in anhydrous EtOH (280 mL) with mechanical stirring. Hydrazine monohydrate (10.27 g, 201 mol, 98% w/w) was added in one portion to the EtOH solution, and the temperature of the solution was brought to 90°C. During the reaction, phthalylhydrazide formation was evidenced by a cloudy-gel-like precipitate. After 8 hours of reaction, the solution was filtered under vacuum and washed with diethyl ether. The solvent was removed and dried *in vacuo*. Distillation under reduced pressure at 180 °C under 2.5 mbar, obtaining a light

yellow liquid ( $(\text{Me}_3\text{Si})_2\text{CH}(\text{SiMe}_2\text{CH}_2\text{NH}_2)$ ) (7.2 g, 73%).  $^1\text{H}$  NMR (400 MHz,  $\text{CDCl}_3$ )  $\delta$  -0.69 (s, 1H, CH), 0.11 (s, 18H,  $\text{SiMe}_3$ ), 0.15 (s, 6H,  $\text{SiMe}_2$ ), 2.22 (s, 2H,  $\text{CH}_2$ ).  $^{13}\text{C}$  NMR (101 MHz,  $\text{CDCl}_3$ )  $\delta$  0.0 ( $\text{SiMe}_3$ ), 1.9 ( $\text{SiMe}_2$ ), 3.8 (CH), 33.5 ( $\text{CH}_2$ ). HRMS (ESI) calcd for  $\text{C}_{10}\text{H}_{30}\text{NSi}_3$   $[\text{M}+\text{H}]^+$  248.16860, found: 248.16789.

### Step 3: Preparation of 2b

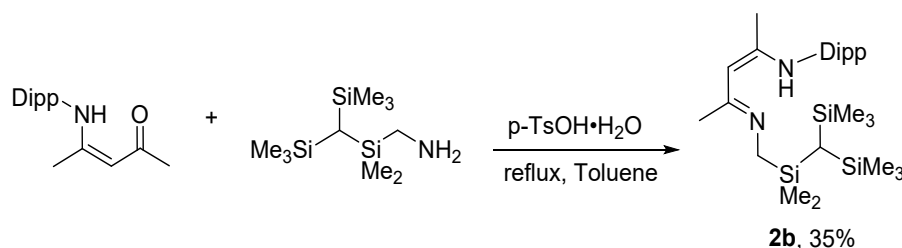

$(\text{Me}_3\text{Si})_2\text{CH}(\text{SiMe}_2\text{CH}_2\text{NH}_2)$  (1.24 g, 5.0 mmol), 2-((2,6-Diisopropylphenyl)imido)-2-penten-4-one<sup>1</sup> (1.30 g, 5.0 mmol) and a catalytic amount of *p*-toluenesulfonic acid in toluene (10 mL) were combined and heated at reflux for 24 h. The solvent was removed and dried *in vacuo*. The unreacted 2-((2,6-Diisopropylphenyl)imido)-2-penten-4-one and formed  $\text{DippNH}_2$  are removed by distillation at 200 °C/2.5 mbar to give brown oil **2b** without other purification, yielding at least 35%.  $^1\text{H}$  NMR (400 MHz,  $\text{CDCl}_3$ )  $\delta$  -0.70 (s, 1H, CH), 0.07 (s, 18H,  $\text{SiMe}_3$ ), 0.13 (s, 6H,  $\text{SiMe}_2$ ), 1.10 (d,  $J = 6.9$  Hz, 6H,  $\text{CH}(\text{CH}_3)_2$ ), 1.13 (d,  $J = 7.0$  Hz, 6H,  $\text{CH}(\text{CH}_3)_2$ ), 1.60 (s, 3H,  $\text{MeC}(\text{N})$ ), 2.00 (s, 3H,  $\text{MeC}(\text{N})$ ), 2.75 (s, 2H,  $\text{SiMe}_2\text{CH}_2$ ), 2.93 (dt,  $J = 13.4, 6.6$  Hz, 2H,  $\text{CH}(\text{CH}_3)_2$ ), 4.65 (s, 1H,  $\text{MeC}(\text{N})\text{CH}$ ), 7.02 (d,  $J = 6.9$  Hz, 1H, ArH), 7.08 (d,  $J = 7.2$  Hz, 2H, ArH), 10.65 (br s, 1H, NH).  $^{13}\text{C}$  NMR (101 MHz,  $\text{CDCl}_3$ )  $\delta$  0.0 ( $\text{SiMe}_3$ ), 1.8 ( $\text{SiMe}_2$ ), 3.3 (CH), 19.8 ( $\text{CH}(\text{CH}_3)_2$ ), 21.7 ( $\text{CH}(\text{CH}_3)_2$ ), 23.4 ( $\text{MeC}(\text{N})$ ), 24.1 ( $\text{MeC}(\text{N})$ ), 27.9 ( $\text{CH}(\text{CH}_3)_2$ ), 35.3 ( $\text{SiMe}_2\text{CH}_2$ ), 92.6 ( $\text{MeC}(\text{N})\text{CH}$ ), 122.4 (Ar), 122.7 (Ar), 138.5 (Ar), 147.2 (Ar), 157.8 (imine C), 166.2 (imine C). HRMS (ESI) calcd for  $\text{C}_{27}\text{H}_{53}\text{N}_2\text{Si}_3$   $[\text{M}+\text{H}]^+$  489.35165, found: 489.35070.

### Preparation of B

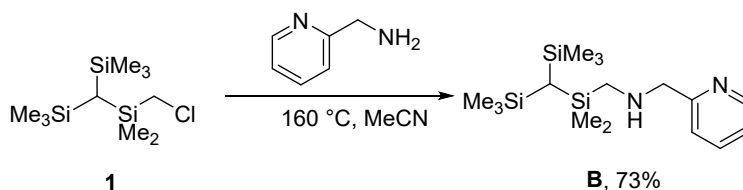

To a 250 mL Schlenk tube containing a magnetic stirring bar were added MeCN (60

mL), (Me<sub>3</sub>Si)<sub>2</sub>CH(SiMe<sub>2</sub>CH<sub>2</sub>Cl) **1** (2.67 g, 10 mmol, 1.0 equiv) and 2-aminomethylpyridine (3.24 g, 3.0 equiv, 30 mmol). The reaction mixture was stirred at 160 °C for 18 h. The reaction was allowed to cool to rt, quenched with H<sub>2</sub>O and extracted with DCM. The combined organics were washed with brine, dried over Na<sub>2</sub>SO<sub>4</sub>, concentrated under reduced pressure and purified by column chromatography over silica gel (eluent: DCM : MeOH = 20:1) afford the title compound **B** as yellow oil (2.46 g, 73%). <sup>1</sup>H NMR (400 MHz, CDCl<sub>3</sub>) δ -0.68 (s, 1H, CH), 0.07 (s, 18H, SiMe<sub>3</sub>), 0.16 (s, 6H, SiMe<sub>2</sub>), 2.08 (s, 2H, SiMe<sub>2</sub>CH<sub>2</sub>), 3.89 (s, 2H, pyridineCH<sub>2</sub>), 7.18 – 7.11 (m, 1H, pyridine), 7.30 (d, *J* = 7.7 Hz, 1H, pyridine), 7.63 (t, *J* = 6.8 Hz, 1H, pyridine), 8.55 (d, *J* = 4.0 Hz, 1H, pyridine). <sup>13</sup>C NMR (101 MHz, CDCl<sub>3</sub>) δ 0.0 (SiMe<sub>3</sub>), 1.4 (SiMe<sub>2</sub>), 3.1 (CH), 41.1 (SiMe<sub>2</sub>CH<sub>2</sub>), 59.1 (pyridineCH<sub>2</sub>), 121.6 (pyridine), 122.2 (pyridine), 135.9 (pyridine), 149.1 (pyridine), 160.0 (pyridine). HRMS (ESI) calcd for C<sub>16</sub>H<sub>35</sub>N<sub>2</sub>Si<sub>3</sub> [M+H]<sup>+</sup> 339.21080, found: 339.21001.

### Preparation of C

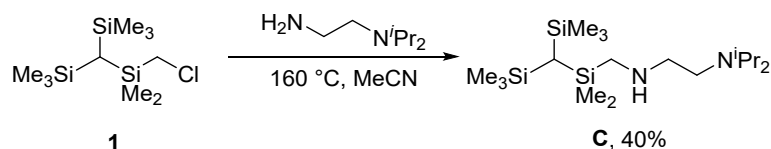

To a 100 mL Schlenk tube containing a magnetic stirring bar were added MeCN (30 mL), (Me<sub>3</sub>Si)<sub>2</sub>CH(SiMe<sub>2</sub>CH<sub>2</sub>Cl) **1** (2.67 g, 10 mmol, 1.0 equiv) and N',N'-diisopropyl-ethane-1,2-diamine (4.33 g, 3.0 equiv, 30 mmol). The reaction mixture was stirred at 160 °C for 18 h. The reaction was allowed to cool to rt, quenched with H<sub>2</sub>O and extracted with DCM. The combined organics were washed with brine, dried over Na<sub>2</sub>SO<sub>4</sub>, concentrated under reduced pressure and purified by column chromatography over silica gel (eluent: PE :EA = 5:1 to DCM : MeOH = 20:1) afford the title compound **C** as light yellow oil (1.49 g, 40%). <sup>1</sup>H NMR (400 MHz, CDCl<sub>3</sub>) δ -0.69 (s, 1H, CH), 0.10 (s, 18H, SiMe<sub>3</sub>), 0.15 (s, 6H, SiMe<sub>2</sub>), 0.98 (d, *J* = 6.6 Hz, 12H, CH(CH<sub>3</sub>)<sub>2</sub>), 2.09 (s, 2H, SiMe<sub>2</sub>CH<sub>2</sub>), 2.56 (s, 4H, CH<sub>2</sub>CH<sub>2</sub>), 2.99 (dt, *J* = 13.2, 6.6 Hz, 2H, CH(CH<sub>3</sub>)<sub>2</sub>). <sup>13</sup>C NMR (101 MHz, CDCl<sub>3</sub>) δ 0.0 (SiMe<sub>3</sub>), 1.5 (SiMe<sub>2</sub>), 2.9 (CH), 20.5 (CH(CH<sub>3</sub>)<sub>2</sub>), 41.9 (SiMe<sub>2</sub>CH<sub>2</sub>), 43.6 (CH<sub>2</sub>CH<sub>2</sub>), 47.4 (CH(CH<sub>3</sub>)<sub>2</sub>), 53.6 (CH<sub>2</sub>CH<sub>2</sub>). HRMS (ESI) calcd for C<sub>18</sub>H<sub>47</sub>N<sub>2</sub>Si<sub>3</sub> [M+H]<sup>+</sup> 375.30470, found: 375.30367.

## Preparation of 2c

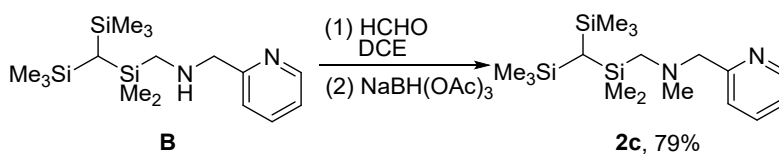

Aqueous formaldehyde (423 mg, 5.6 mmol, 2.0 equiv, 40% in water) was added to a solution of **B** (944 mg, 2.8 mmol, 1.0 equiv) in 1,2-dichloroethane (15 mL). After 15 min, NaBH(OAc)<sub>3</sub> (1.2 g, 5.6 mmol, 2.0 equiv) was added portion-wise to the reaction mixture and stirring was continued for 24 h at room temperature. The reaction was quenched by the addition of an aqueous solution of 2 M NaOH (10 mL). The organic layer was separated and the aqueous layer was extracted with DCM. The organic layer was dried with Na<sub>2</sub>SO<sub>4</sub> and concentrated under reduced pressure. The residue was purified by column chromatography over silica gel using gradient hexane/ethyl acetate/Et<sub>3</sub>N to DCM/MeOH mixture as eluent to afford the pure **2c** as yellow oil (776 mg, 79% yield). <sup>1</sup>H NMR (400 MHz, CDCl<sub>3</sub>) δ -0.66 (s, 1H, CH), 0.07 (s, 18H, SiMe<sub>3</sub>), 0.19 (s, 6H, SiMe<sub>2</sub>), 1.99 (s, 2H, SiMe<sub>2</sub>CH<sub>2</sub>), 2.22 (s, 3H, NMe), 3.60 (s, 2H, pyridineCH<sub>2</sub>), 7.13 (dd, *J* = 6.8, 5.5 Hz, 1H, pyridine), 7.48 (d, *J* = 7.8 Hz, 1H, pyridine), 7.64 (td, *J* = 7.7, 1.7 Hz, 1H, pyridine), 8.56–8.44 (m, 1H, pyridine). <sup>13</sup>C NMR (101 MHz, CDCl<sub>3</sub>) δ -0.1 (SiMe<sub>3</sub>), 0.0 (SiMe<sub>2</sub>), 1.5 (CH), 44.6 (NMe), 49.6 (SiMe<sub>2</sub>CH<sub>2</sub>), 66.3 (pyridineCH<sub>2</sub>), 120.0 (pyridine), 121.2 (pyridine), 134.5 (pyridine), 147.1 (pyridine), 158.4 (pyridine). HRMS (ESI) calcd for C<sub>17</sub>H<sub>37</sub>N<sub>2</sub>Si<sub>3</sub> [M+H]<sup>+</sup> 353.22645, found: 353.22610.

## Preparation of 2d

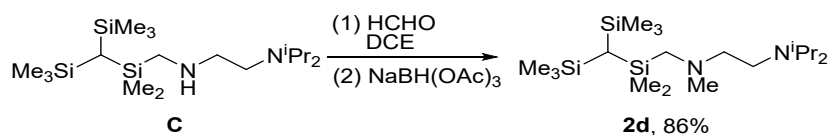

Aqueous formaldehyde (601 mg, 8.0 mmol, 2.0 equiv, 40% in water) was added to a solution of **C** (1.49 g, 4.0 mmol, 1.0 equiv) in 1,2-dichloroethane (20 mL). After 15 min, NaBH(OAc)<sub>3</sub> (1.7 g, 8.0 mmol, 2.0 equiv) was added portion-wise to the reaction mixture, and stirring was continued for 24 h at room temperature. The reaction was quenched by the addition of an aqueous solution of 2 M NaOH (15 mL). The organic

layer was separated, and the aqueous layer was extracted with DCM. The organic layer was dried with Na<sub>2</sub>SO<sub>4</sub> and concentrated under reduced pressure. The residue was purified by column chromatography over silica gel using gradient hexane/ethyl acetate/Et<sub>3</sub>N mixture as eluent to afford the pure **2d** as light yellow oil (1.33 g, 86% yield). <sup>1</sup>H NMR (400 MHz, CDCl<sub>3</sub>) δ -0.67 (s, 1H, CH), 0.11 (s, 18H, SiMe<sub>3</sub>), 0.18 (s, 6H, SiMe<sub>2</sub>), 1.00 (d, *J* = 6.5 Hz, 12H, CH(CH<sub>3</sub>)<sub>2</sub>), 1.90 (s, 2H, SiMe<sub>2</sub>CH<sub>2</sub>), 2.20 (s, 3H, NMe), 2.35–2.26 (m, 2H, CH<sub>2</sub>CH<sub>2</sub>), 2.50–2.43 (m, 2H, CH<sub>2</sub>CH<sub>2</sub>), 3.03–2.87 (m, 2H, CH(CH<sub>3</sub>)<sub>2</sub>). <sup>13</sup>C NMR (101 MHz, CDCl<sub>3</sub>) δ 0.0 (SiMe<sub>3</sub>), 0.1 (SiMe<sub>2</sub>), 1.6 (CH), 18.9 (CH(CH<sub>3</sub>)<sub>2</sub>), 42.3 (SiMe<sub>2</sub>CH<sub>2</sub>), 45.1 (CH(CH<sub>3</sub>)<sub>2</sub>), 47.6 (NMe), 50.3 (CH<sub>2</sub>CH<sub>2</sub>), 62.4 (CH<sub>2</sub>CH<sub>2</sub>). HRMS (ESI) calcd for C<sub>19</sub>H<sub>49</sub>N<sub>2</sub>Si<sub>3</sub> [M+H]<sup>+</sup> 389.32035, found: 389.31931.

#### Preparation of (Me<sub>3</sub>Si)<sub>2</sub>CH{SiMe<sub>2</sub>CH<sub>2</sub>N(CH<sub>2</sub>-2-C<sub>5</sub>H<sub>3</sub>N)<sub>2</sub>} **2e**

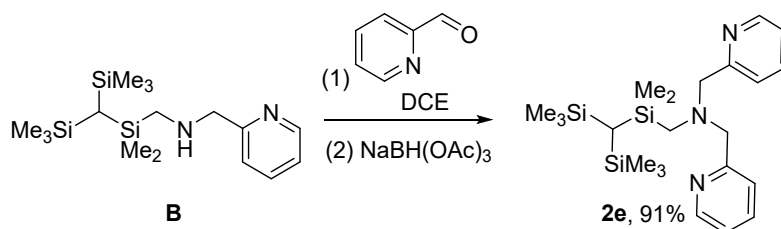

Pyridine-2-carbaldehyde (675 mg, 6.3 mmol, 2.1 equiv) was added to a solution of **B** (1.02 g, 3 mmol, 1.0 equiv) in 1,2-dichloroethane (20 mL). After 15 min, NaBH(OAc)<sub>3</sub> (1.27 g, 6.0 mmol, 2.0 equiv) was added portion-wise to the reaction mixture and stirring was continued for 24 h at room temperature. The reaction was quenched by the addition of an aqueous solution of 2 M NaOH (15 mL). The organic layer was separated and the aqueous layer was extracted with DCM. The organic layer was dried with Na<sub>2</sub>SO<sub>4</sub> and concentrated under reduced pressure. The residue was purified by column chromatography over silica gel using gradient hexane/ethyl acetate/Et<sub>3</sub>N to DCM/MeOH mixture as eluent to afford the pure **2e** as orange yellow oil (1.17 g, 91% yield). <sup>1</sup>H NMR (400 MHz, CDCl<sub>3</sub>) δ -0.79 (s, 1H, CH), 0.00 (s, 18H, SiMe<sub>3</sub>), 0.16 (s, 6H, SiMe<sub>2</sub>), 2.14 (s, 2H, SiMe<sub>2</sub>CH<sub>2</sub>), 3.71 (s, 4H, pyridineCH<sub>2</sub>), 7.18–7.11 (m, 2H, pyridine), 7.57 (d, *J* = 7.6 Hz, 2H, pyridine), 7.67 (t, *J* = 7.1 Hz, 2H, pyridine), 8.51 (d, *J* = 4.0 Hz, 2H, pyridine). <sup>13</sup>C NMR (101 MHz, CDCl<sub>3</sub>) δ 0.0 (SiMe<sub>3</sub>), 0.6 (SiMe<sub>2</sub>), 1.5 (CH), 45.8 (SiMe<sub>2</sub>CH<sub>2</sub>), 62.3 (pyridineCH<sub>2</sub>), 120.2 (pyridine), 121.2 (pyridine), 134.6 (pyridine), 147.2 (pyridine), 158.2 (pyridine). HRMS (ESI) calcd for C<sub>22</sub>H<sub>40</sub>N<sub>3</sub>Si<sub>3</sub>

[M+H]<sup>+</sup> 430.25300, found: 430.25314.

### Preparation of HC(SiMe<sub>2</sub>CH<sub>2</sub>Cl)<sub>3</sub>

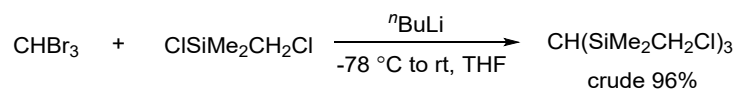

A 2.4 M solution of *n*BuLi in hexane (54 mL cm<sup>3</sup>, 131 mmol), cooled to -78 °C was added dropwise with vigorous stirring to a mixture of ClSiMe<sub>2</sub>CH<sub>2</sub>Cl (17 g, 119 mmol) and CHBr<sub>3</sub> (10 g, 40 mmol) in THF (80 mL) maintained at -78 °C. When the addition was completed, the mixture was stirred at -78 °C for 1 h and was allowed to warm to room temperature, then cautiously treated with water. The organic layer was washed with dilute hydrochloric acid until the washings were colorless, then extracted by ethyl acetate, dried (Na<sub>2</sub>SO<sub>4</sub>), and filtered. The solvent was removed under vacuum to give colorless liquid (12.9 g, 96%) used without other purification. <sup>1</sup>H NMR (400 MHz, CDCl<sub>3</sub>) δ 0.03 (s, 1H, CH), 0.28 (s, 18H, SiMe<sub>2</sub>), 2.83 (s, 6H, CH<sub>2</sub>). <sup>13</sup>C NMR (101 MHz, CDCl<sub>3</sub>) δ 0.0 (SiMe<sub>2</sub>), 32.8 (CH<sub>2</sub>). (The signal from the central carbon atom was difficult to identify in this crude product). HRMS (EI-MS): calculated m/z for C<sub>9</sub>H<sub>23</sub>Cl<sub>2</sub>Si<sub>3</sub> [M-CH<sub>2</sub>Cl]: 285.04846, found: 285.04794.

### Preparation of HC(SiMe<sub>2</sub>CH<sub>2</sub>SAc)<sub>3</sub>

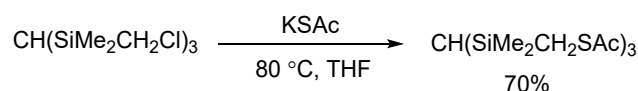

To a stirred solution of HC(SiMe<sub>2</sub>CH<sub>2</sub>Cl)<sub>3</sub> (1.68 g, 5 mmol) in THF (40 mL) was added potassium thioacetate (3.43 g, 30 mmol), and the mixture was stirred at 80 °C for 24 h. And the solvent was evaporated to dryness in *vacuo*, and then added water, and the organic materials were extracted with ethyl acetate. The combined extracts were washed with water and brine, dried over anhydrous Na<sub>2</sub>SO<sub>4</sub>. The organic layer was purified by column chromatography over silica gel (eluent: PE :EA = 20:1) afford the title compound HC(SiMe<sub>2</sub>CH<sub>2</sub>SAc)<sub>3</sub> as orange oil (1.59 g, 70%). <sup>1</sup>H NMR (400 MHz, CDCl<sub>3</sub>) δ -0.33 (s, 1H, CH), 0.17 (s, 18H, SiMe<sub>2</sub>), 2.13 (s, 6H, CH<sub>2</sub>), 2.30 (s, 9H, SAc). <sup>13</sup>C NMR (101 MHz, CDCl<sub>3</sub>) δ -1.0 (SiMe<sub>2</sub>), 0.0 (CH), 15.1 (CH<sub>2</sub>), 29.3 (COCH<sub>3</sub>), 195.3 (CO). HRMS (ESI) calcd for C<sub>16</sub>H<sub>35</sub>O<sub>3</sub>S<sub>3</sub>Si<sub>3</sub> [M+H]<sup>+</sup> 455.10561, found: 455.10444; HRMS (ESI) calcd for C<sub>16</sub>H<sub>38</sub>NO<sub>3</sub>S<sub>3</sub>Si<sub>3</sub> [M+NH<sub>4</sub>]<sup>+</sup> 472.13216, found:

472.13046.

## **2) Copies of NMR Spectra**

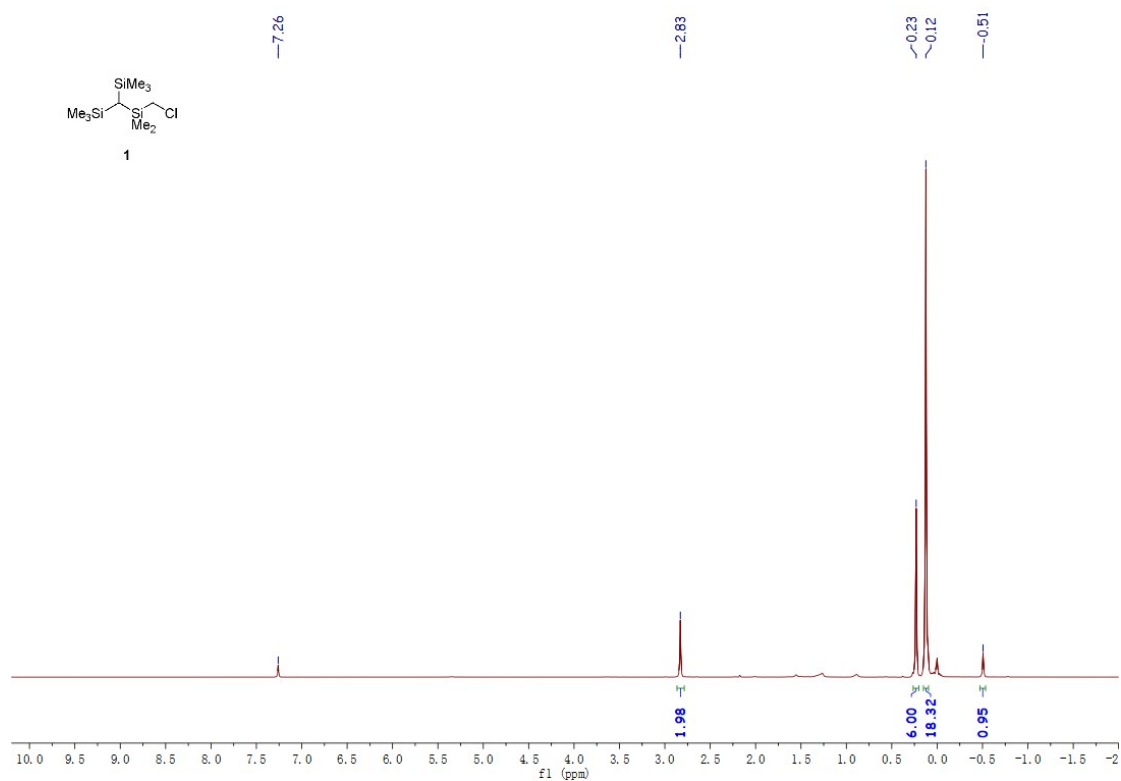

**Figure S1** <sup>1</sup>H NMR of **1** at room temperature.

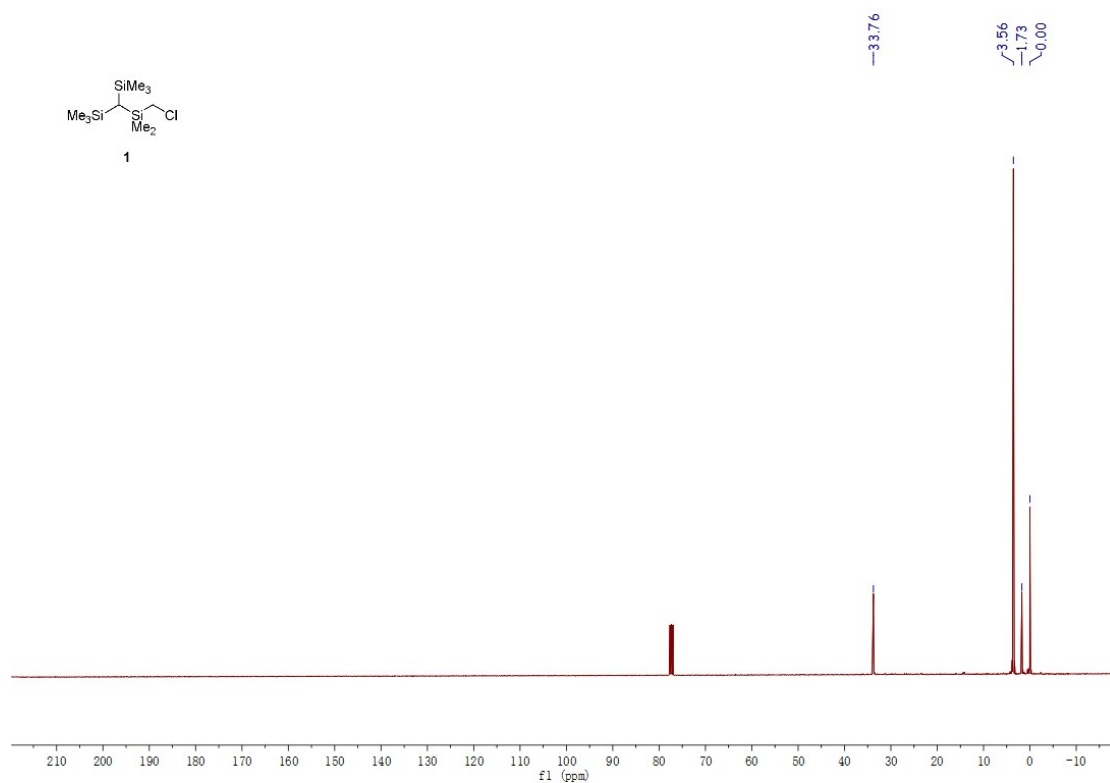

**Figure S2** <sup>13</sup>C NMR of **1** at room temperature.

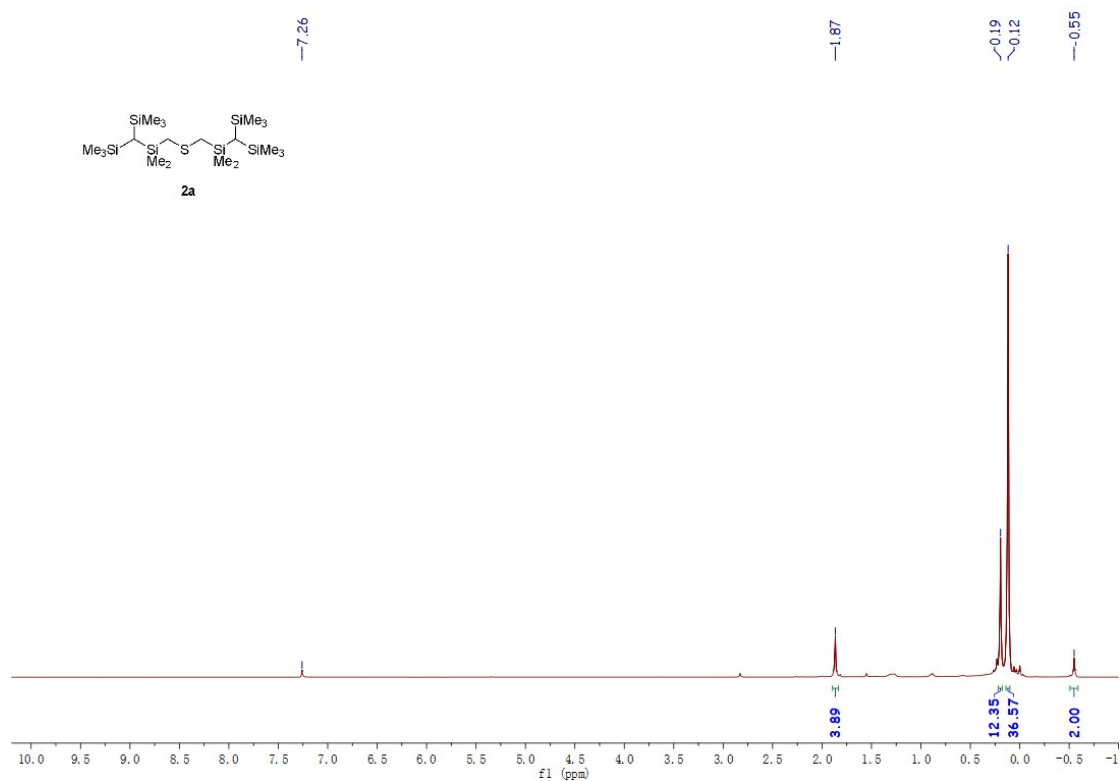

**Figure S3**  $^1\text{H}$  NMR of **2a** at room temperature.

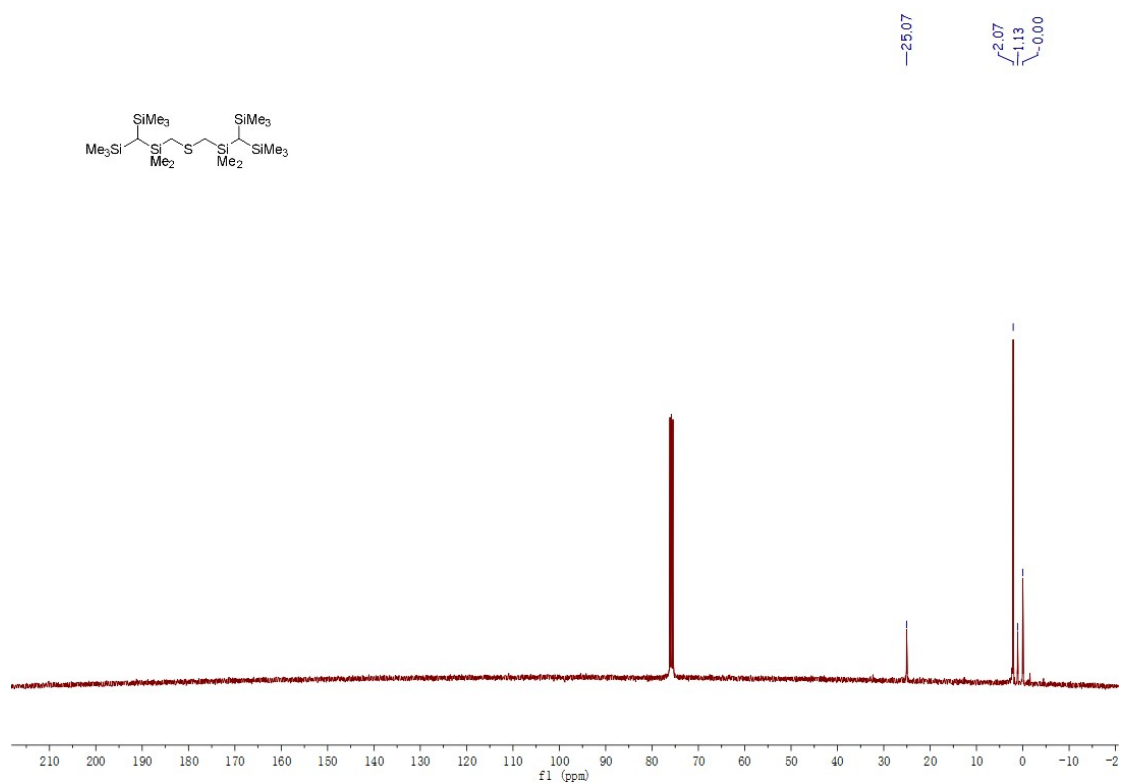

**Figure S4**  $^{13}\text{C}$  NMR of **2a** at room temperature.

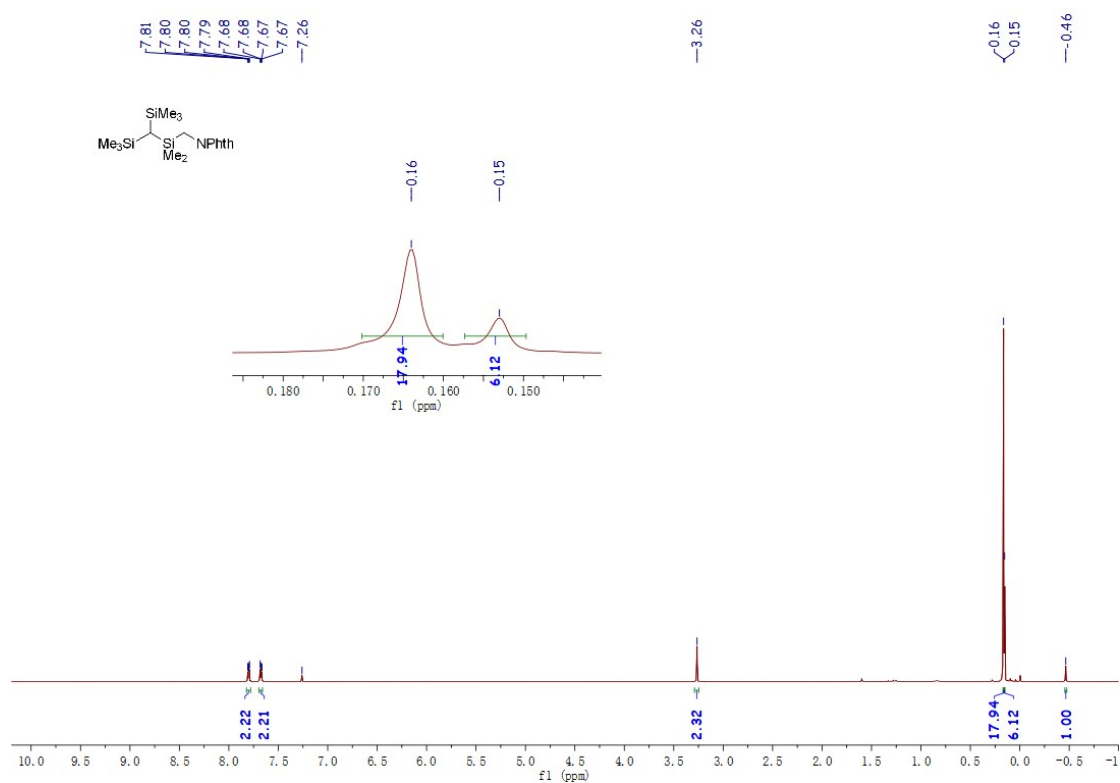

**Figure S5** <sup>1</sup>H NMR of **A** at room temperature.

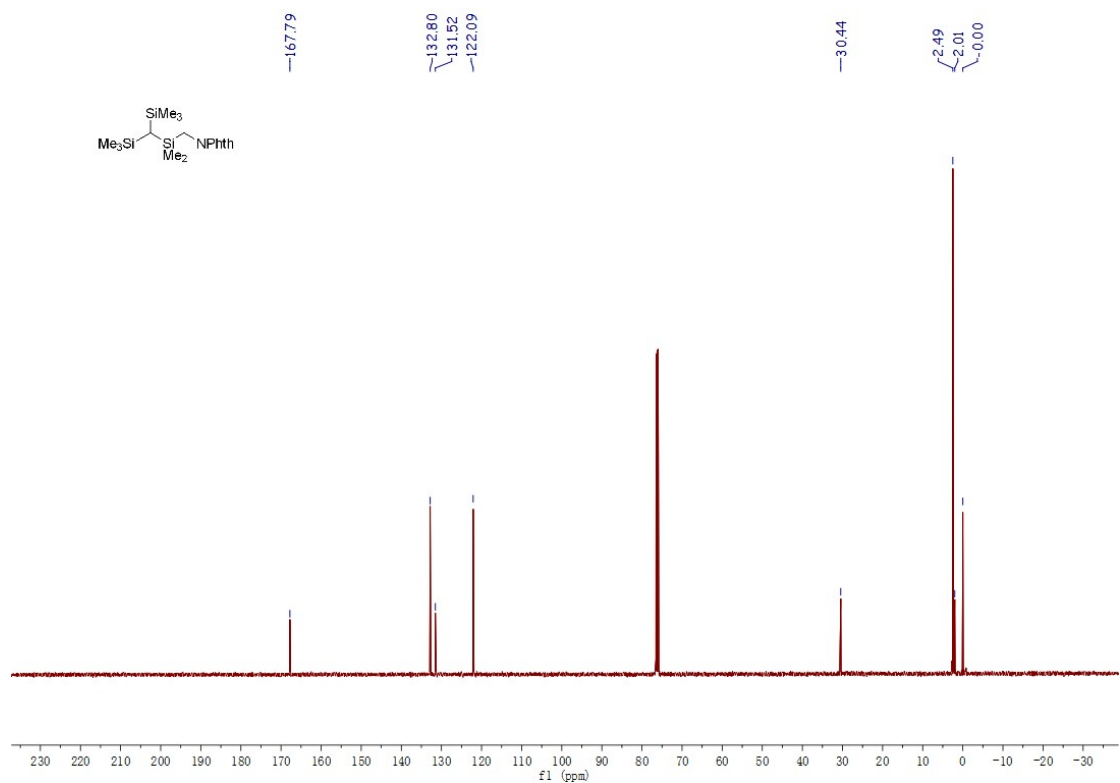

**Figure S6** <sup>13</sup>C NMR of **A** at room temperature.

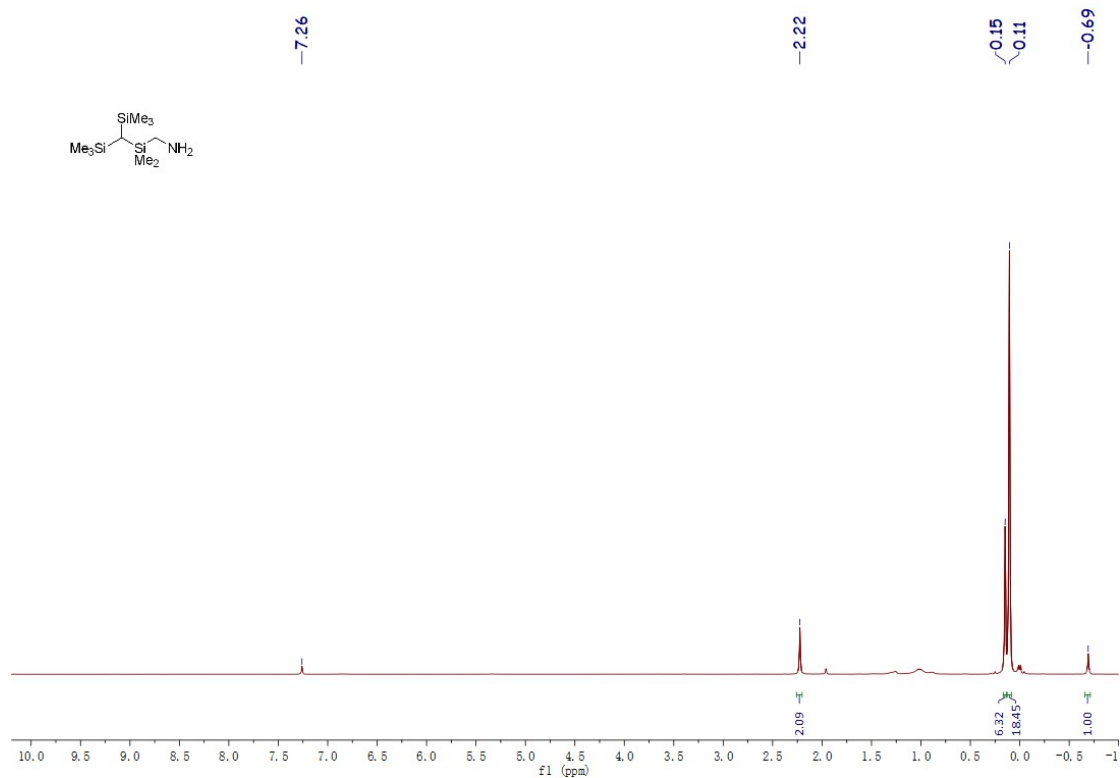

**Figure S7** <sup>1</sup>H NMR of (Me<sub>3</sub>Si)<sub>2</sub>CH(SiMe<sub>2</sub>CH<sub>2</sub>NH<sub>2</sub>) at room temperature.

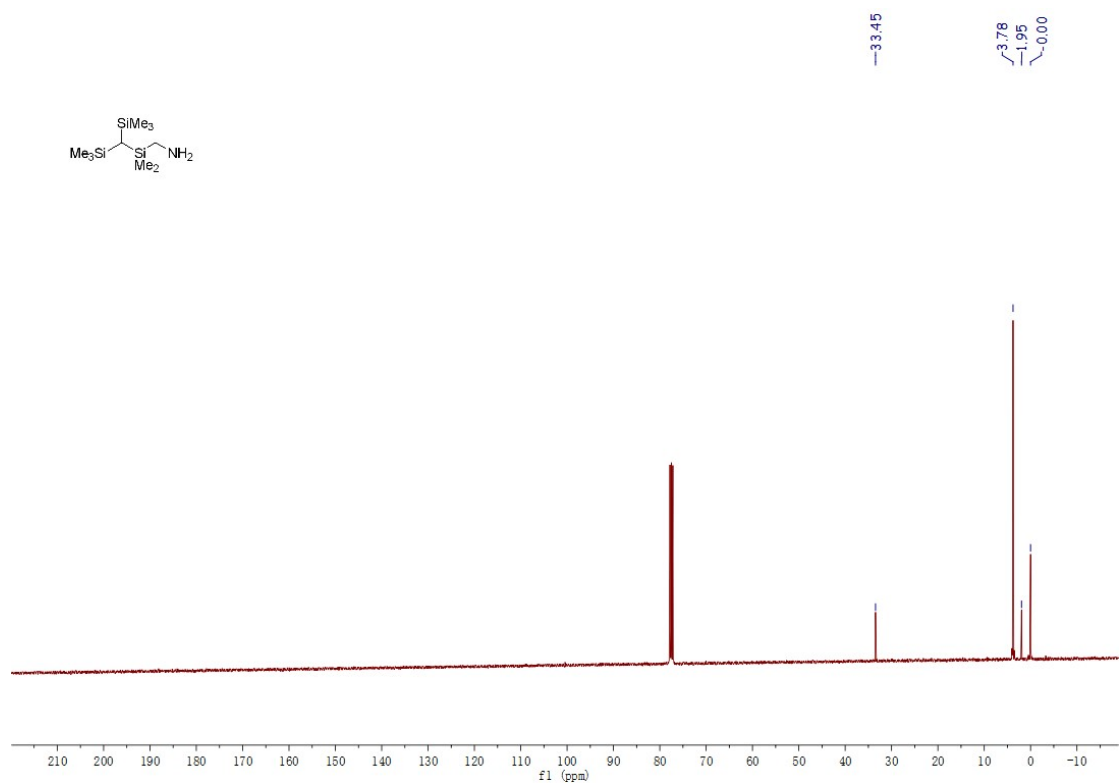

**Figure S8** <sup>13</sup>C NMR of (Me<sub>3</sub>Si)<sub>2</sub>CH(SiMe<sub>2</sub>CH<sub>2</sub>NH<sub>2</sub>) at room temperature.

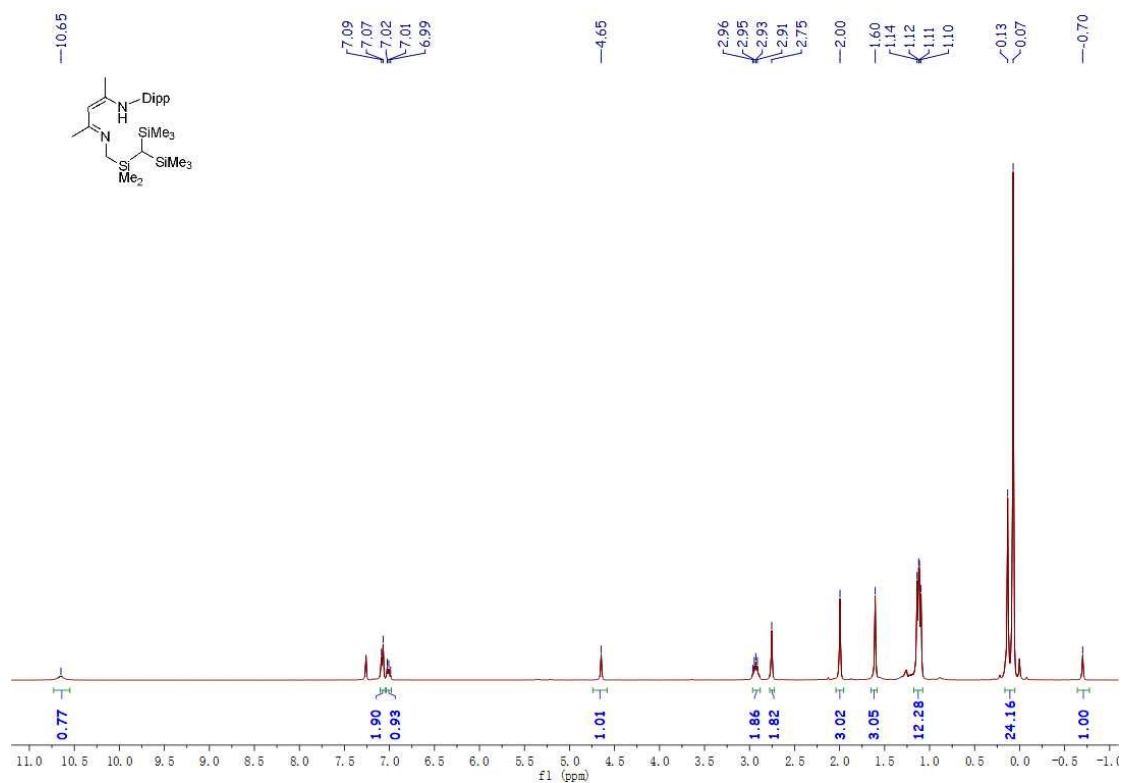

**Figure S9** <sup>1</sup>H NMR of **2b** at room temperature.

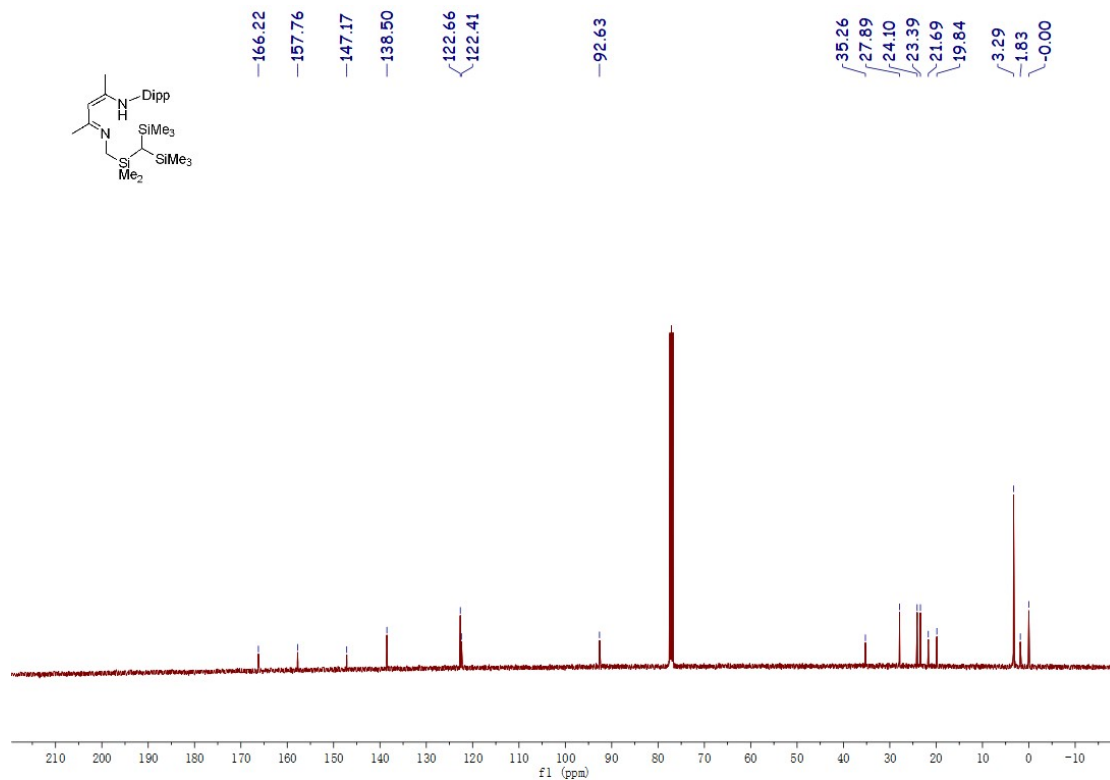

**Figure S10** <sup>13</sup>C NMR of **2b** at room temperature.

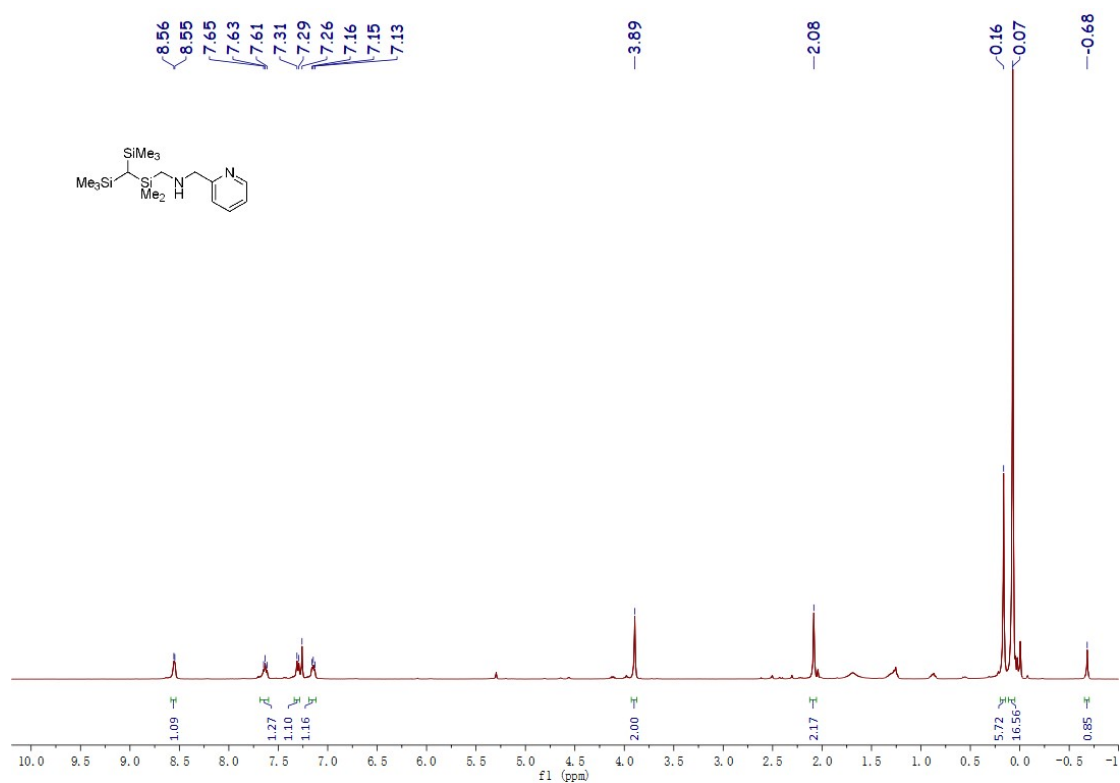

**Figure S11** <sup>1</sup>H NMR of **B** at room temperature.

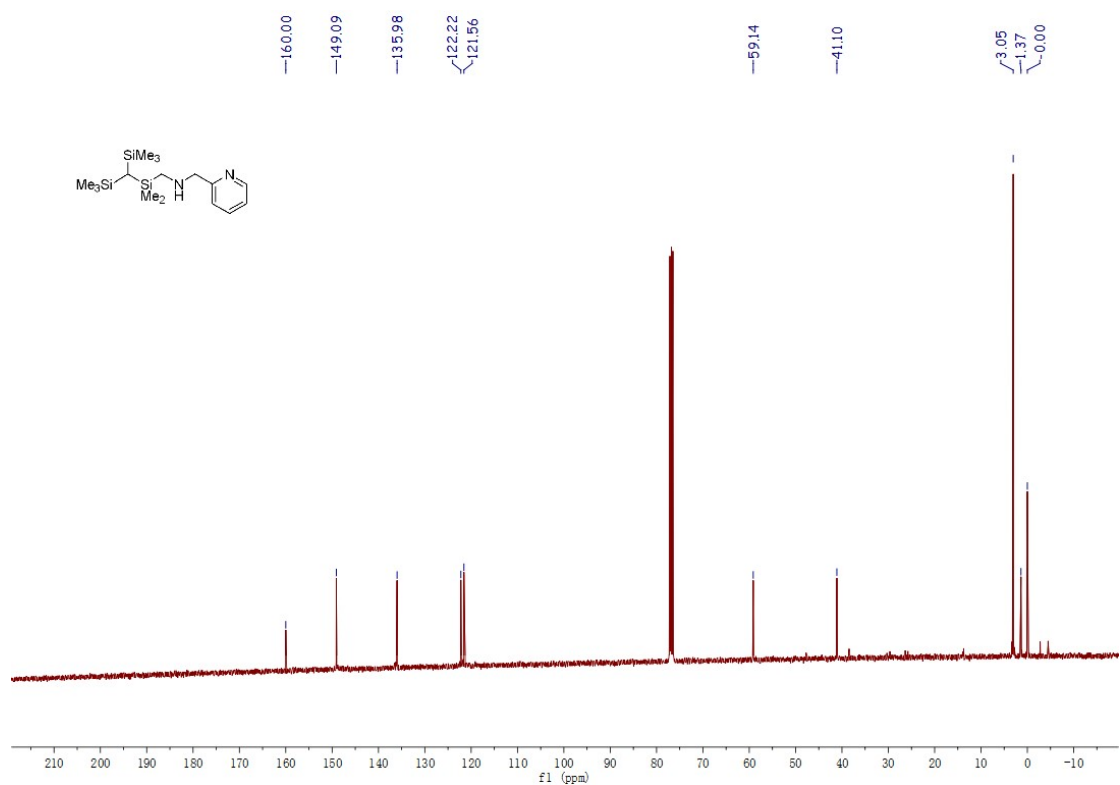

**Figure S12** <sup>13</sup>C NMR of **B** at room temperature.

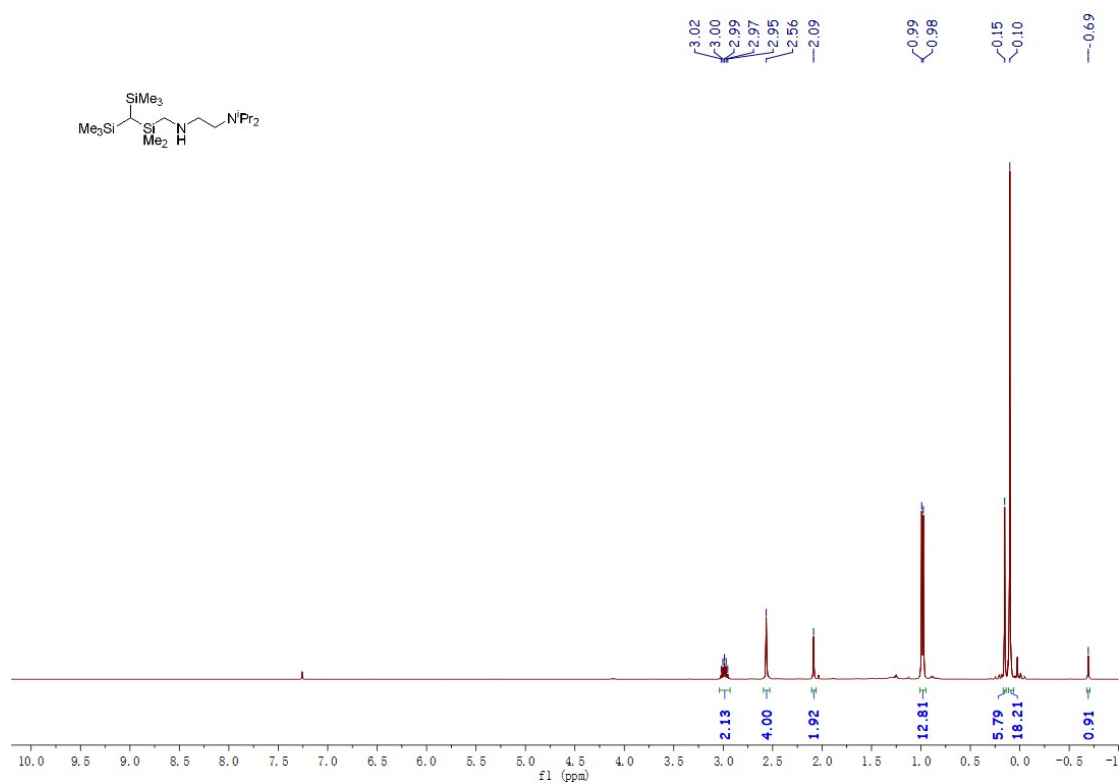

Figure S13 <sup>1</sup>H NMR of C at room temperature.

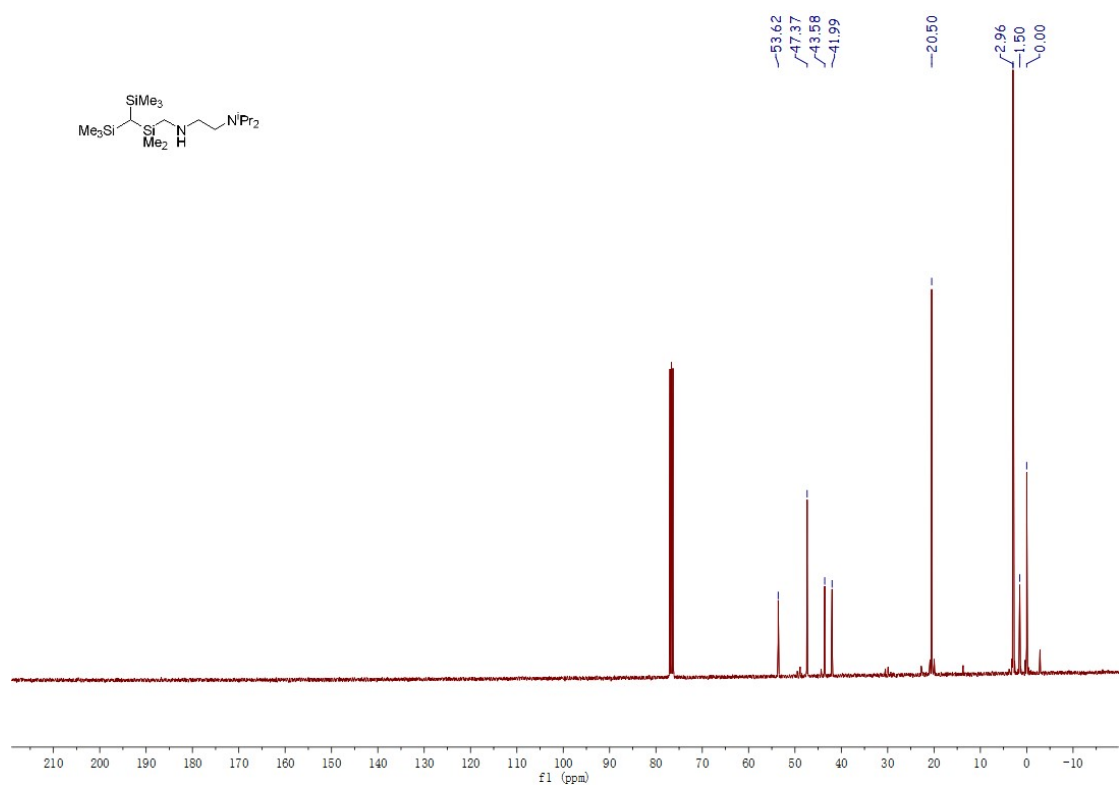

Figure S14 <sup>13</sup>C NMR of C at room temperature.

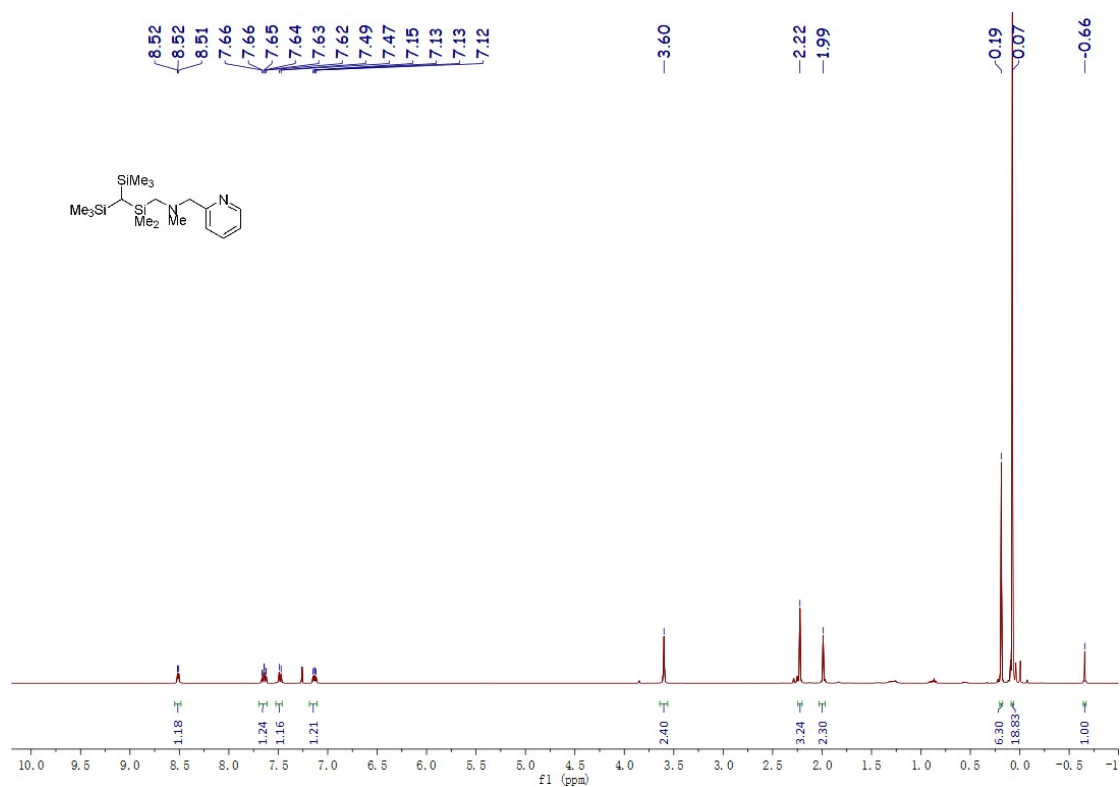

**Figure S15** <sup>1</sup>H NMR of **2c** at room temperature.

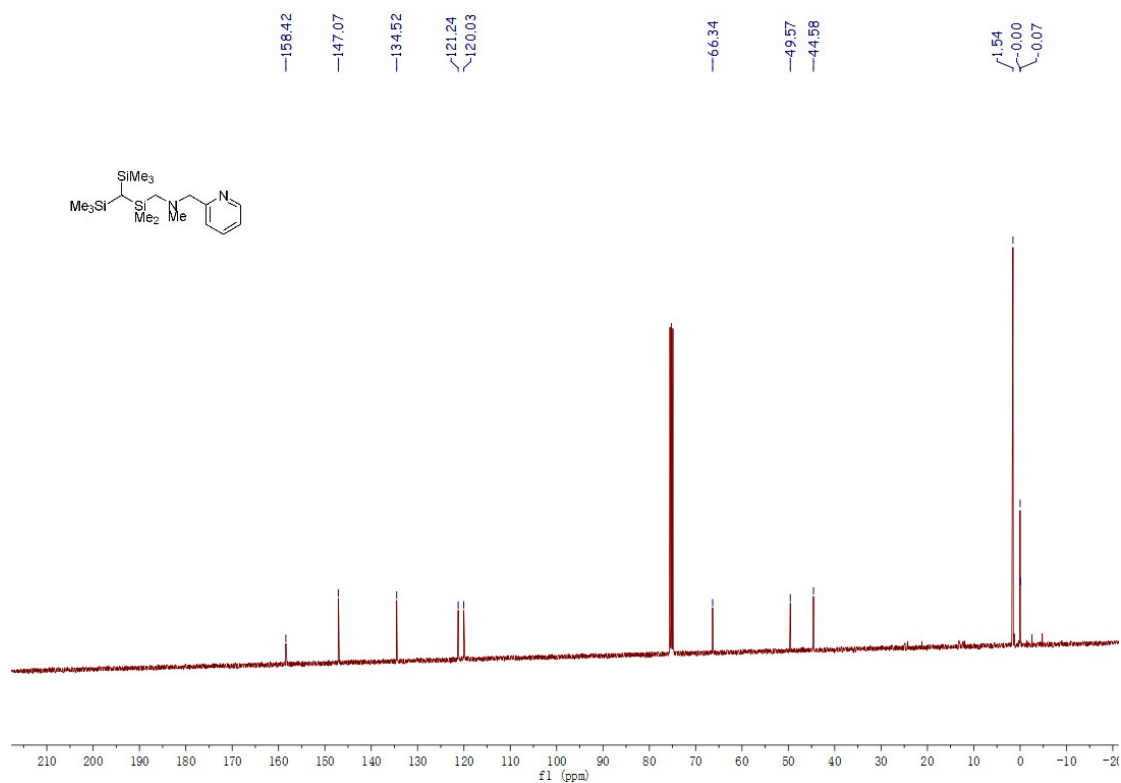

**Figure S16** <sup>13</sup>C NMR of **2c** at room temperature.

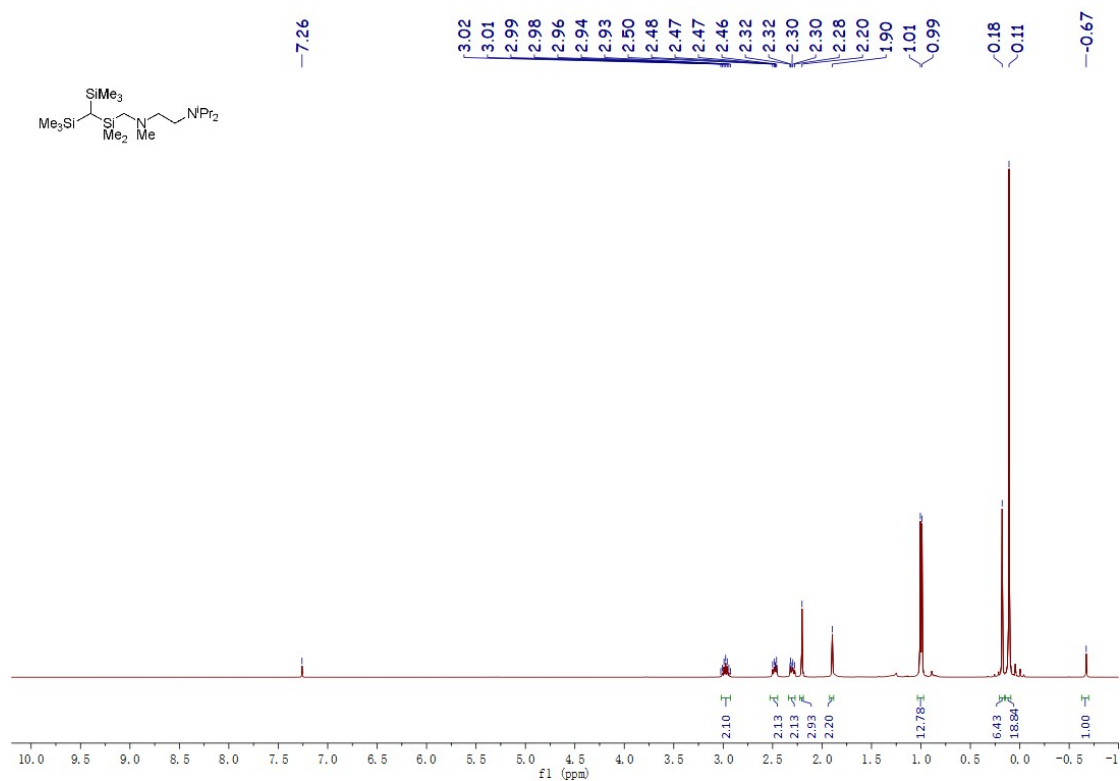

Figure S17 <sup>1</sup>H NMR of **2d** at room temperature.

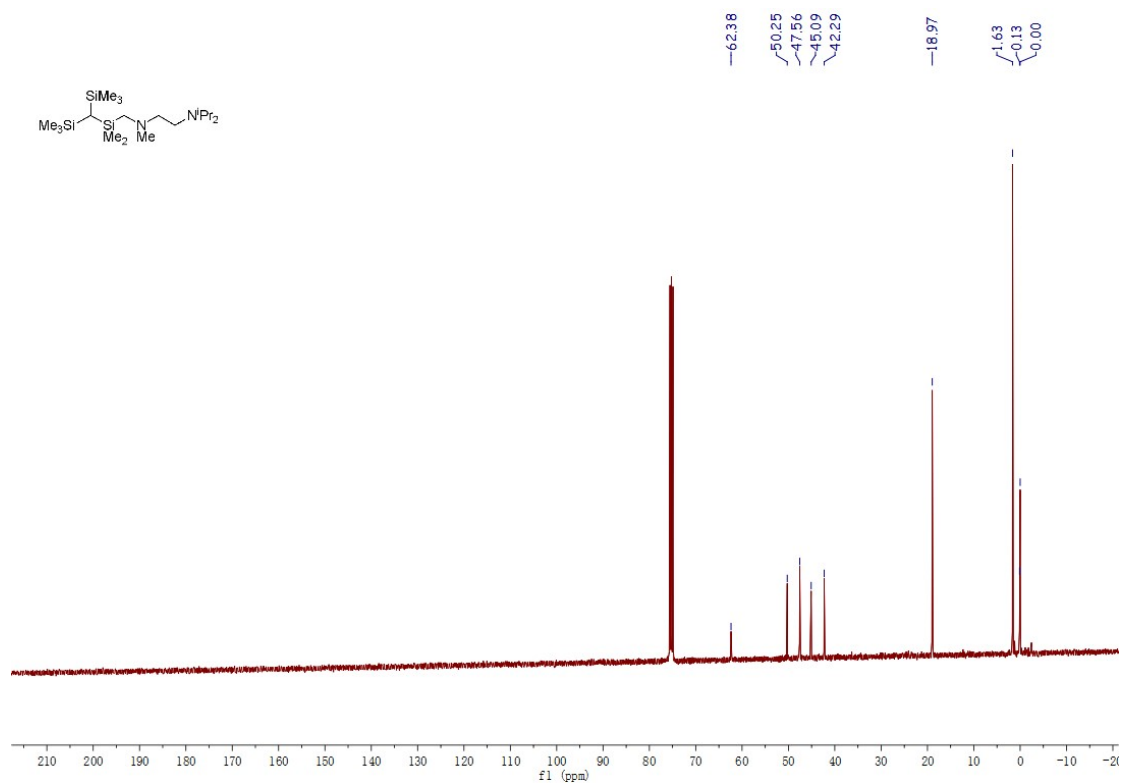

Figure S18 <sup>13</sup>C NMR of **2d** at room temperature.

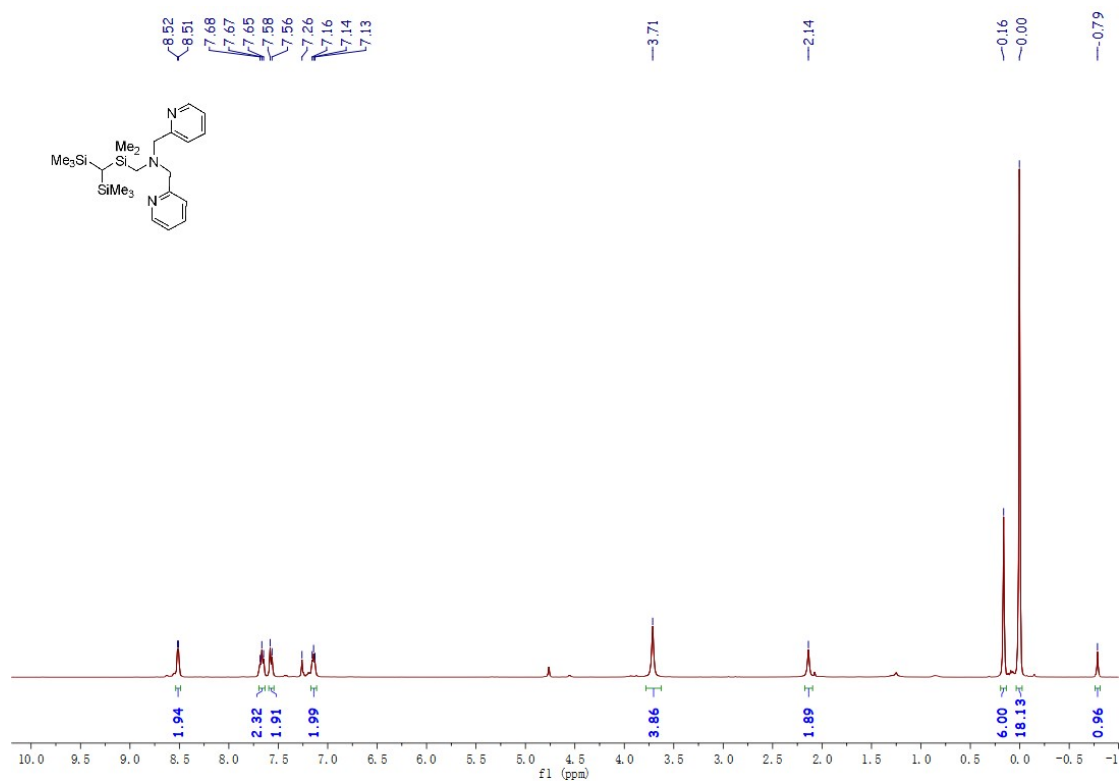

**Figure S19** <sup>1</sup>H NMR of **2e** at room temperature.

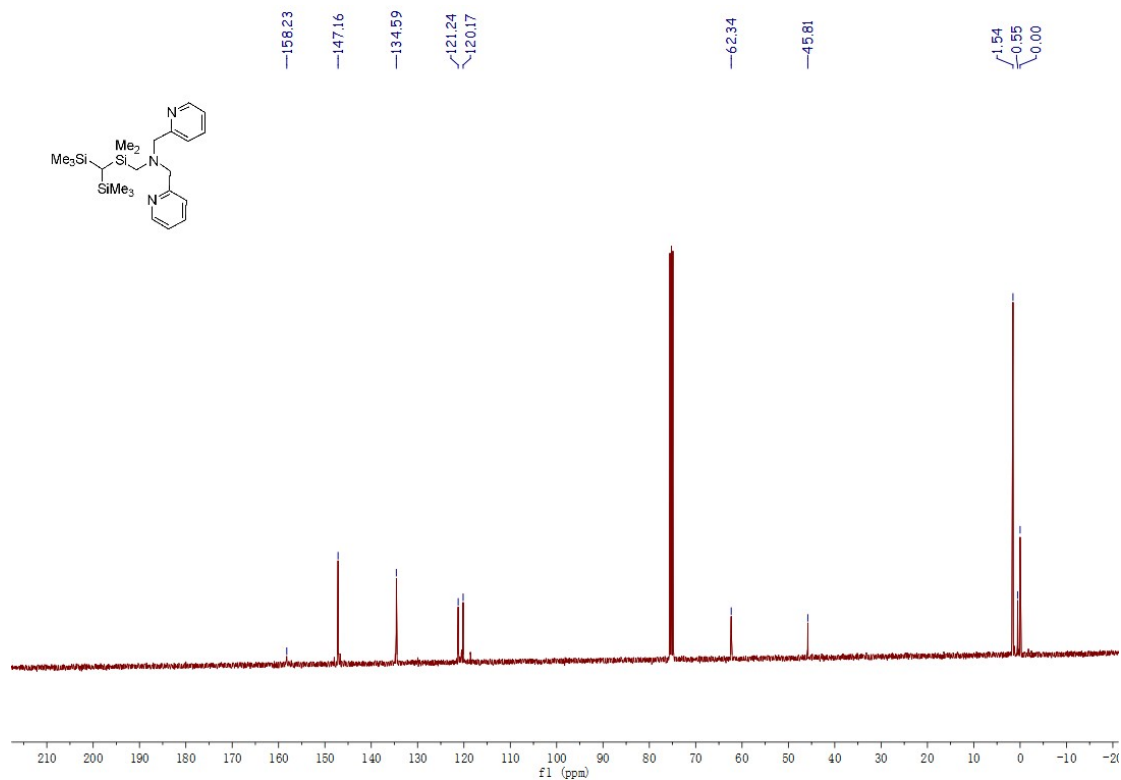

**Figure S20** <sup>13</sup>C NMR of **2e** at room temperature.

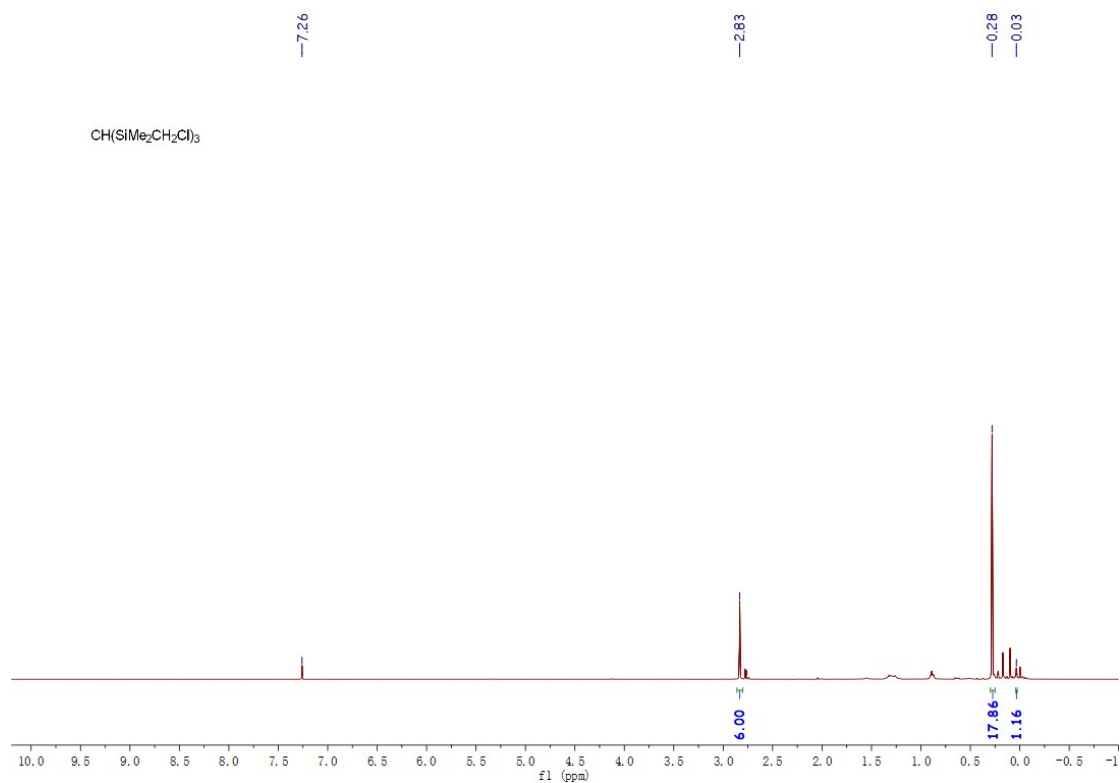

**Figure S21** Crude <sup>1</sup>H NMR of HC(SiMe<sub>2</sub>CH<sub>2</sub>Cl)<sub>3</sub> at room temperature.

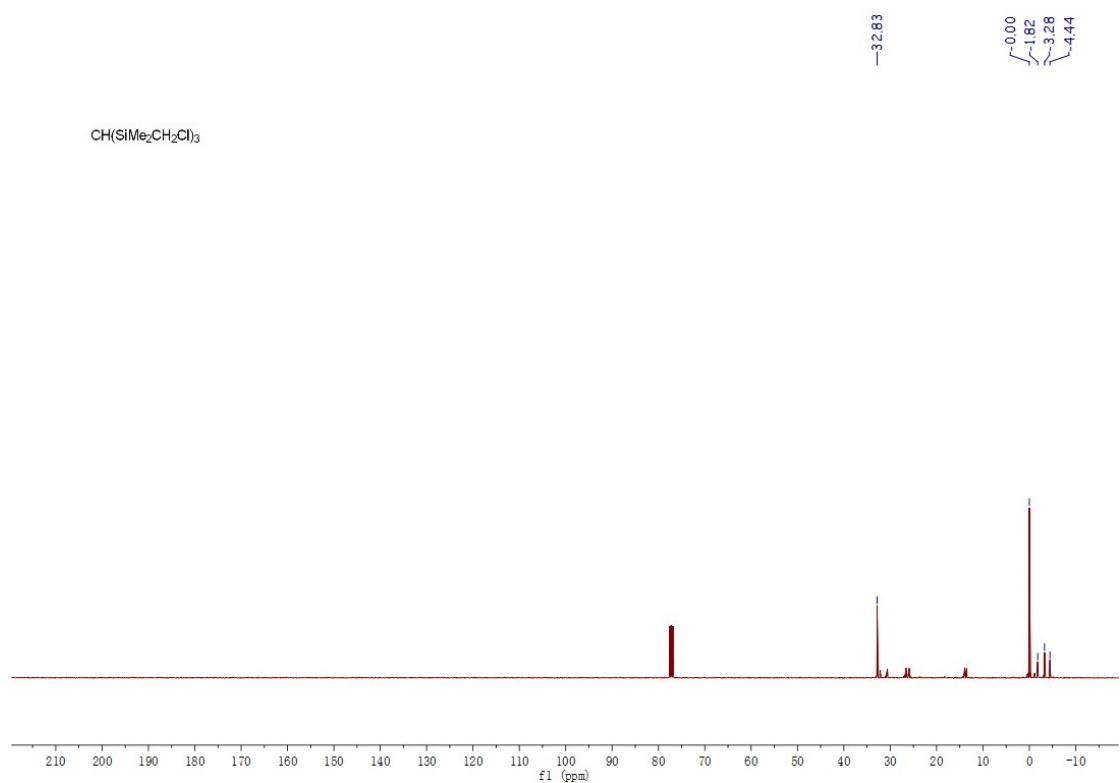

**Figure S22** Crude <sup>13</sup>C NMR of HC(SiMe<sub>2</sub>CH<sub>2</sub>Cl)<sub>3</sub> at room temperature.

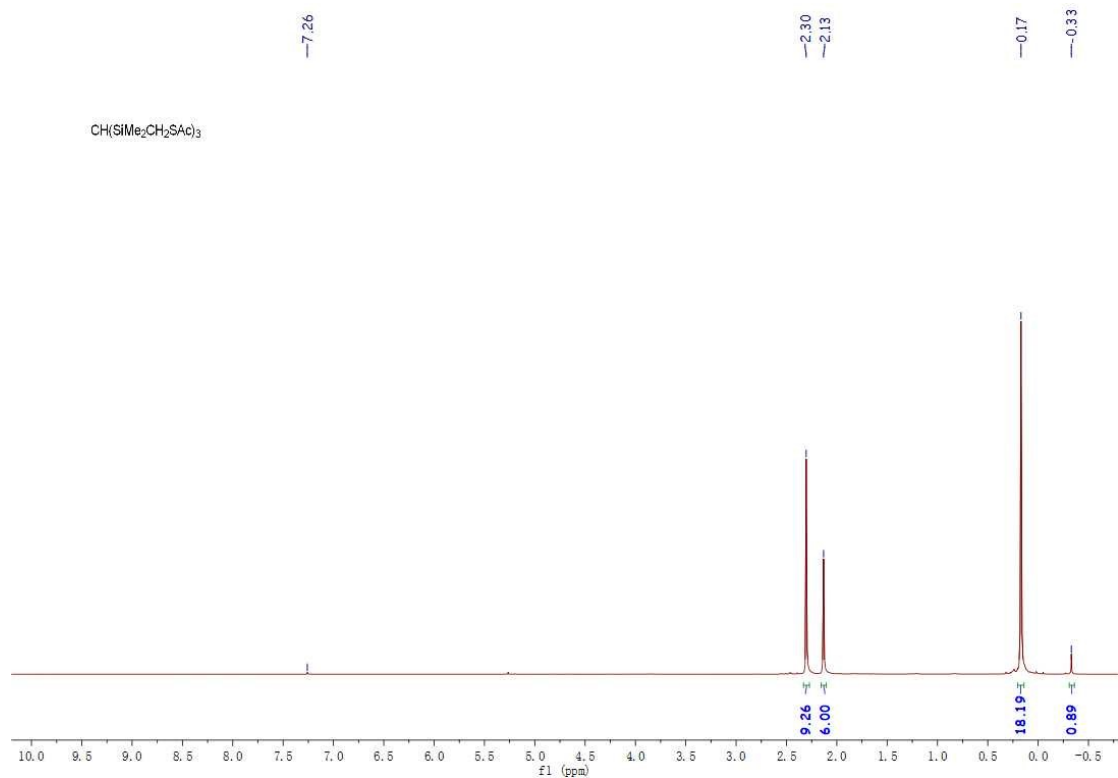

**Figure S23**  $^1\text{H}$  NMR of  $\text{HC}(\text{SiMe}_2\text{CH}_2\text{SAc})_3$  at room temperature.

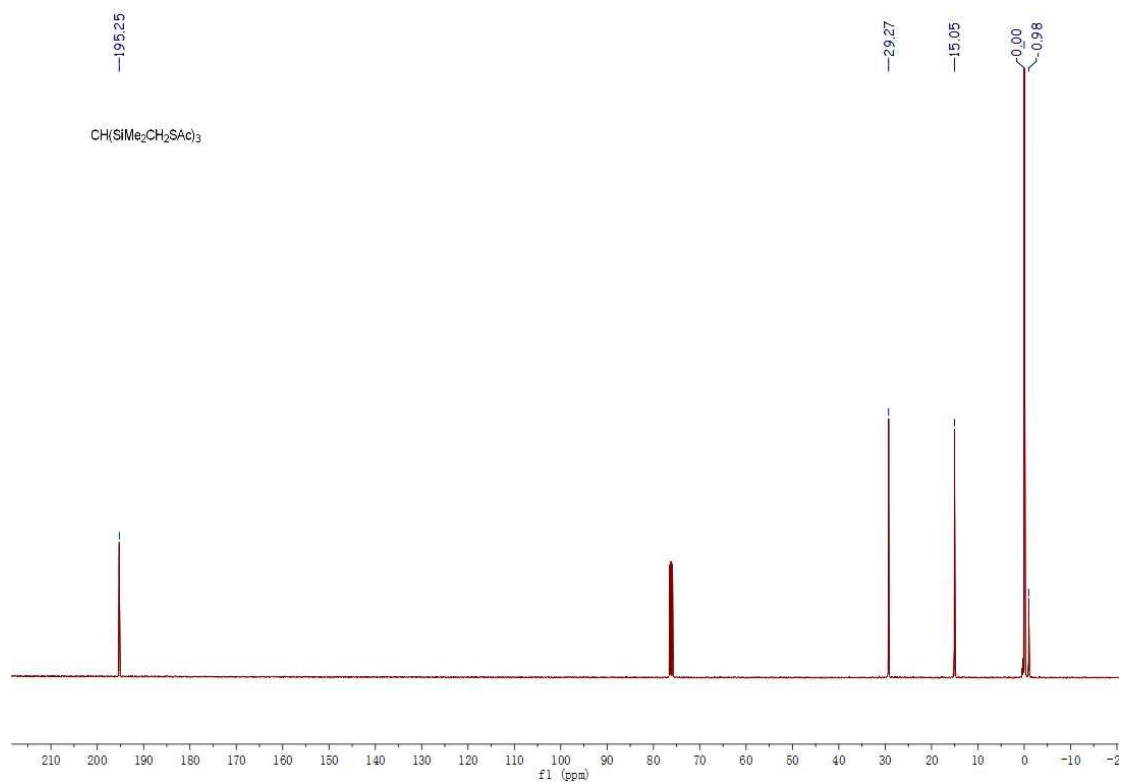

**Figure S24**  $^{13}\text{C}$  NMR of  $\text{HC}(\text{SiMe}_2\text{CH}_2\text{SAc})_3$  at room temperature.

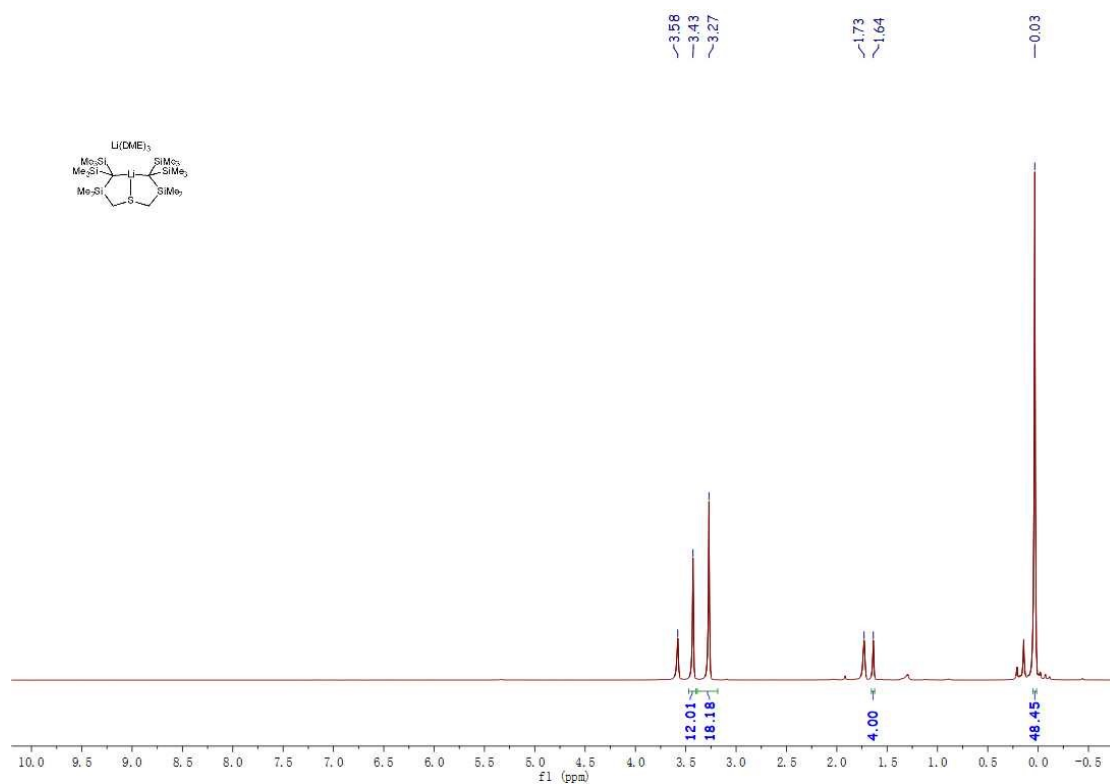

**Figure S25** <sup>1</sup>H NMR of **3a** at room temperature.

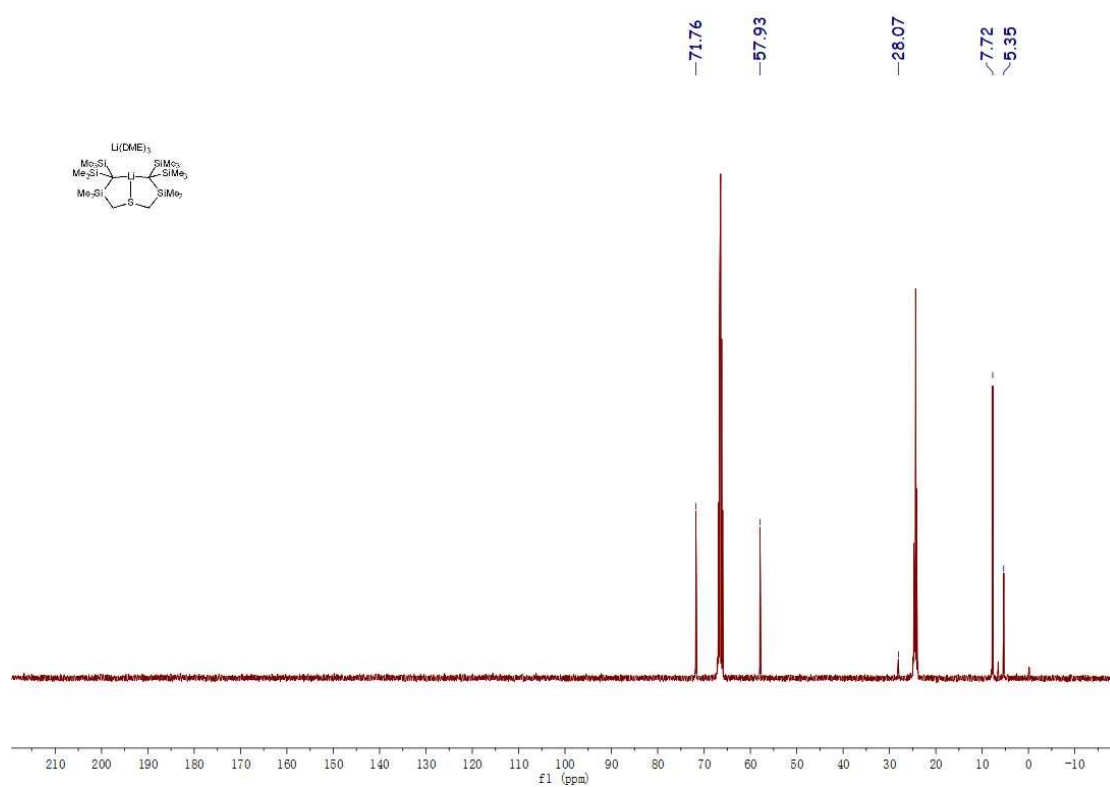

**Figure S26** <sup>13</sup>C NMR of **3a** at room temperature.

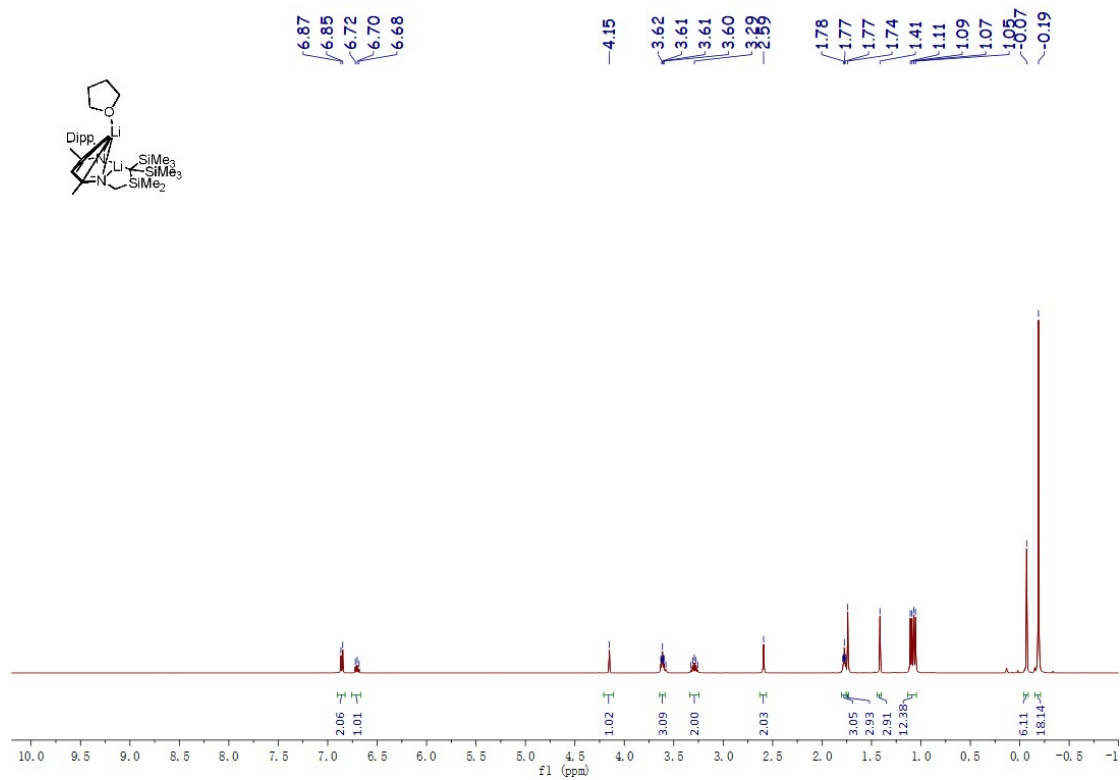

Figure S27 <sup>1</sup>H NMR of **3b** at room temperature.

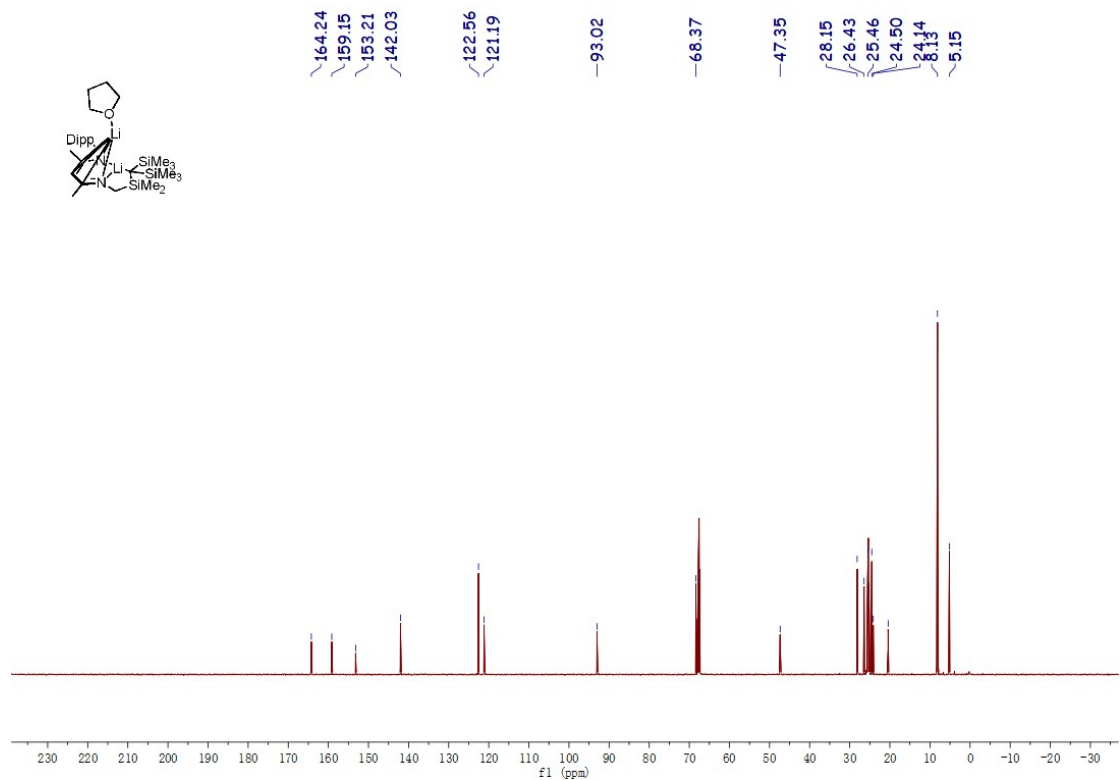

Figure S28 <sup>13</sup>C NMR of **3b** at room temperature.

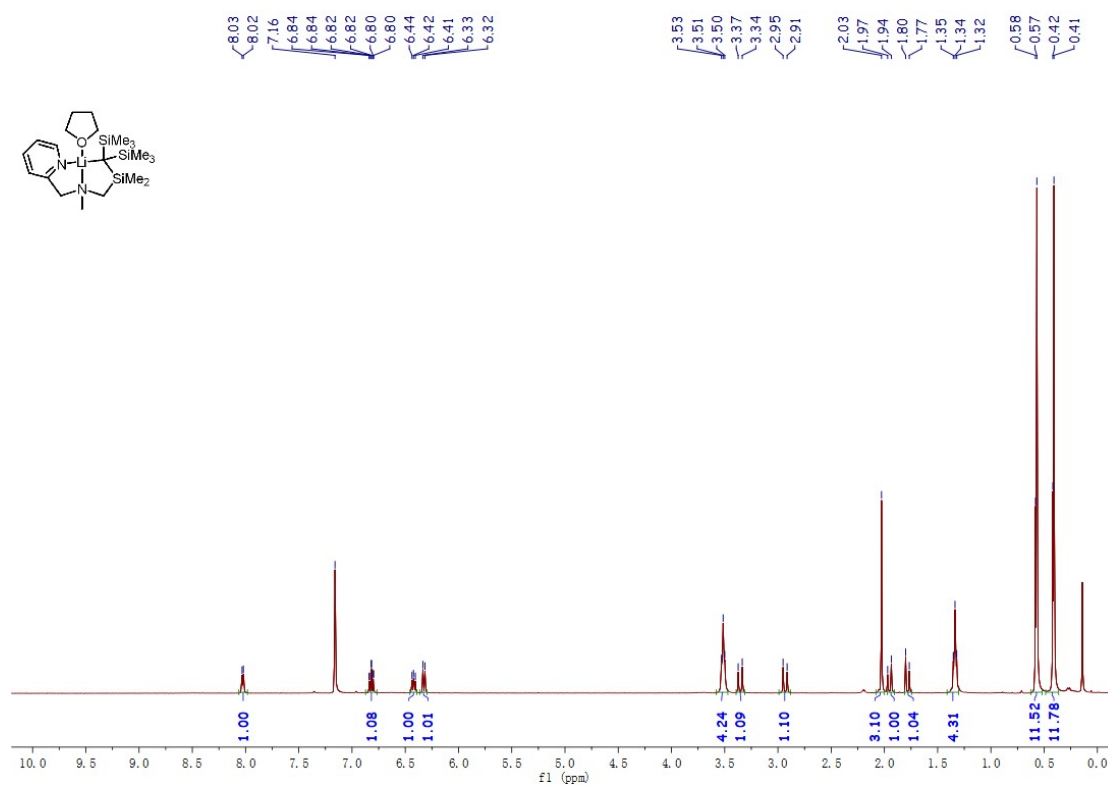

**Figure S29** <sup>1</sup>H NMR of **3c** at room temperature.

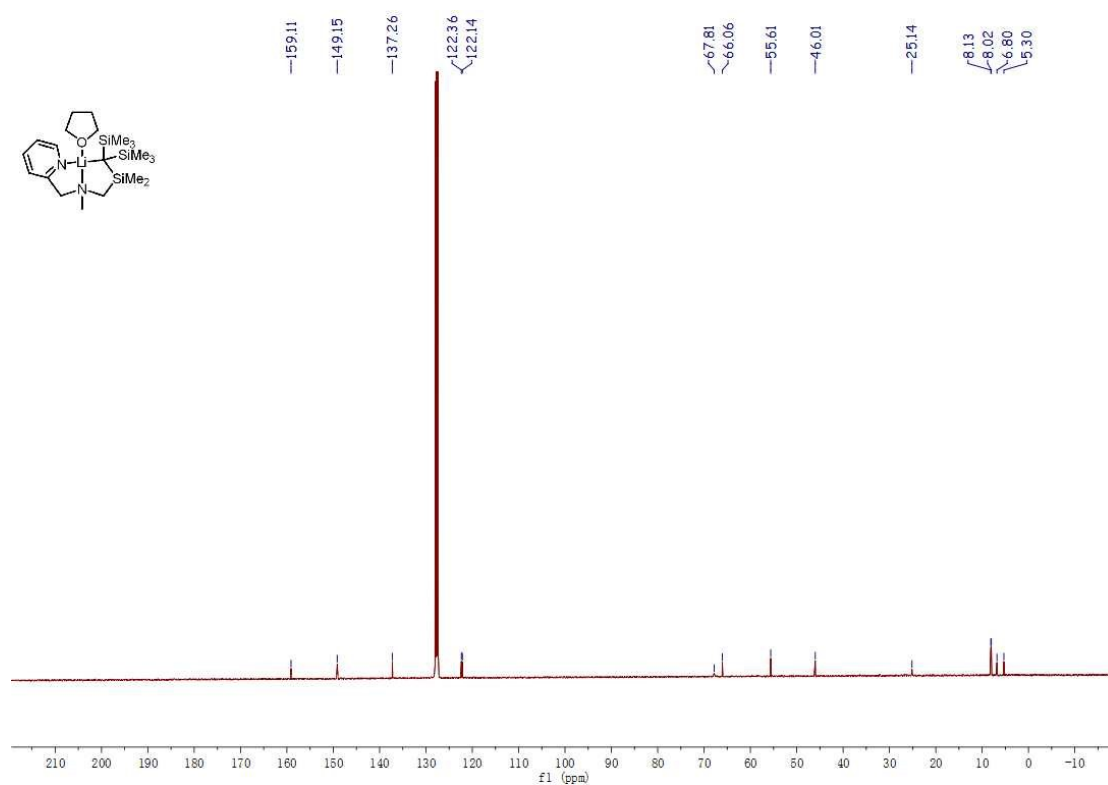

**Figure S30** <sup>13</sup>C NMR of **3c** at room temperature.

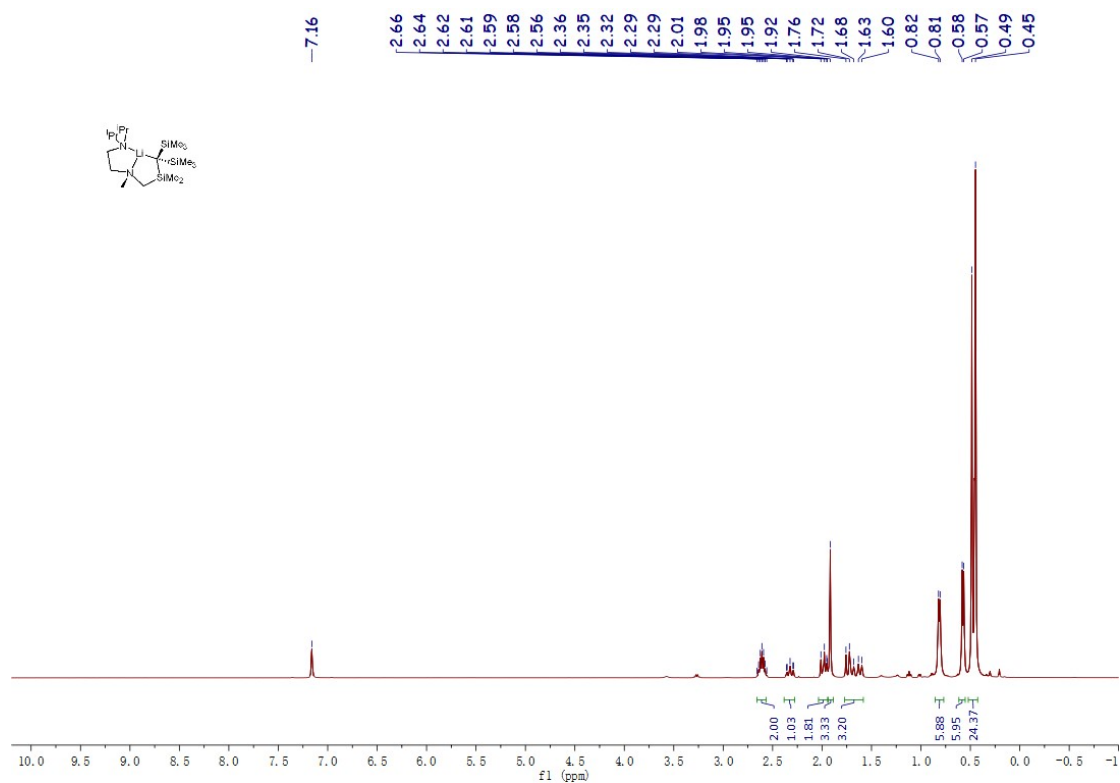

**Figure S31** <sup>1</sup>H NMR of **3d** at room temperature.

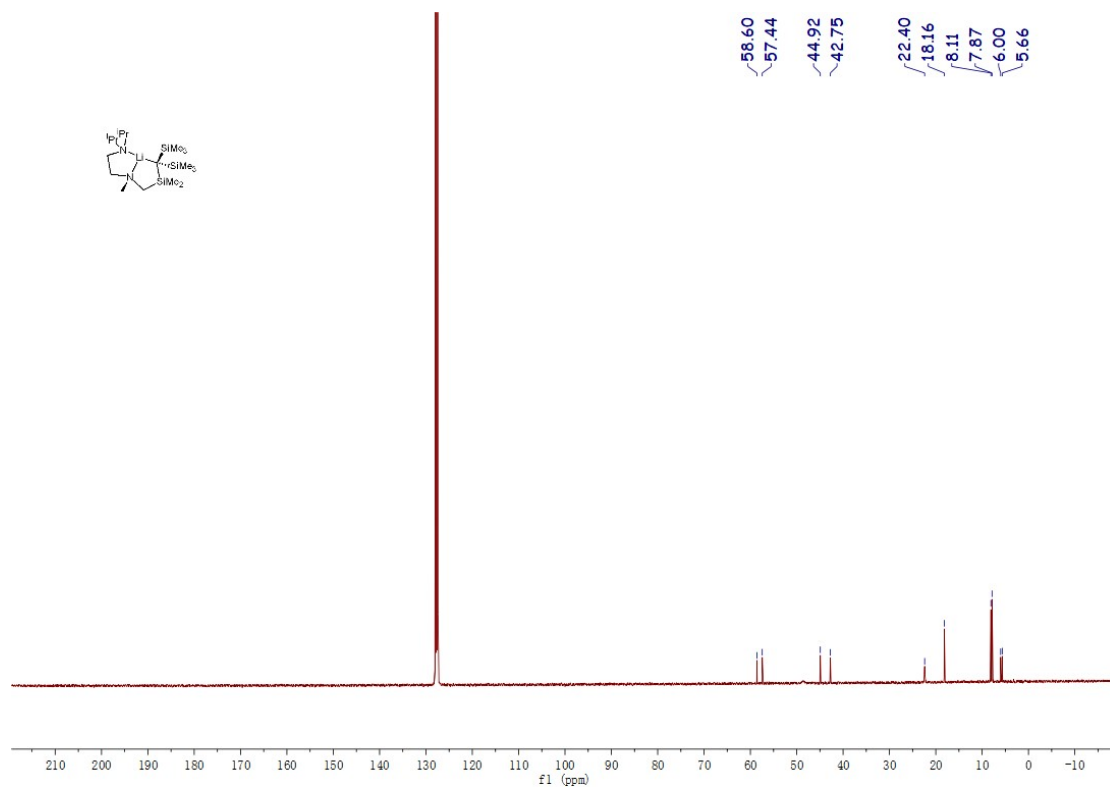

**Figure 32** <sup>13</sup>C NMR of **3d** at room temperature.

### (3) X-ray Crystallographic Studies for 3a', 3b-d, 4-8, S1-3

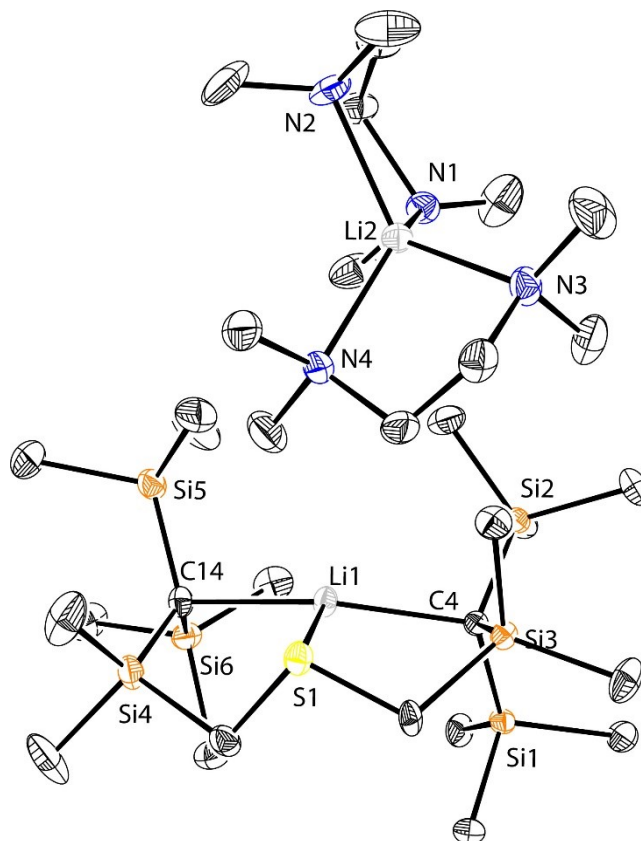

**Figure S33** ORTEP drawing of **3a'**. Thermal ellipsoids are shown at the 30% probability level. Hydrogen atoms are omitted for clarity.

**Table S1** Selected Bond Lengths (Å) and Angles (deg) for **3a'**.

|                  |           |
|------------------|-----------|
| C(4)—Li(1)       | 2.275(10) |
| C(14)—Li(1)      | 2.227(10) |
| S(1)—Li(1)       | 2.534(8)  |
| C(4)—Li(1)—S(1)  | 98.6(3)   |
| C(14)—Li(1)—C(4) | 162.4(4)  |
| C(14)—Li(1)—S(1) | 93.5(3)   |

**Table S2** X-ray crystallographic data for **3a'**.

|                                                | <b>3a'</b>                                                                      |
|------------------------------------------------|---------------------------------------------------------------------------------|
| CCDC number                                    | 2125715                                                                         |
| Empirical formula                              | C <sub>32</sub> H <sub>84</sub> Li <sub>2</sub> N <sub>4</sub> SSi <sub>6</sub> |
| Formula weight                                 | 739.51                                                                          |
| Temperature/K                                  | 180.00(10)                                                                      |
| Crystal system                                 | monoclinic                                                                      |
| Space group                                    | P2 <sub>1</sub> /n                                                              |
| a/Å                                            | 9.4284(2)                                                                       |
| b/Å                                            | 17.4514(4)                                                                      |
| c/Å                                            | 29.3718(6)                                                                      |
| $\alpha/^\circ$                                | 90                                                                              |
| $\beta/^\circ$                                 | 92.695(2)                                                                       |
| $\gamma/^\circ$                                | 90                                                                              |
| Volume/Å <sup>3</sup>                          | 4827.45(18)                                                                     |
| Z                                              | 4                                                                               |
| $\rho_{\text{calc}}$ , g/cm <sup>3</sup>       | 1.017                                                                           |
| $\mu/\text{mm}^{-1}$                           | 0.240                                                                           |
| F(000)                                         | 1640.0                                                                          |
| Crystal size/mm <sup>3</sup>                   | 0.1 x 0.1 x 0.1                                                                 |
| Radiation                                      | MoK $\alpha$ ( $\lambda$ = 0.71073)                                             |
| 2 $\Theta$ range for data collection/ $^\circ$ | 4.604 to 54.966                                                                 |
| Index ranges                                   | -12 $\leq$ h $\leq$ 12, -22 $\leq$ k $\leq$ 22, -38 $\leq$ l $\leq$             |
| Reflections collected                          | 99372                                                                           |
| Independent reflections                        | 11070 [ $R_{\text{int}}$ = 0.0370, $R_{\text{sigma}}$ = 0.02]                   |
| Data/restraints/parameters                     | 11070/482/622                                                                   |
| Goodness-of-fit on F <sup>2</sup>              | 1.071                                                                           |
| R <sub>1</sub> [ $ I  \geq 2\sigma(I)$ ]       | 0.0379                                                                          |
| wR <sub>2</sub> [all data]                     | 0.0961                                                                          |
| Largest diff. peak/hole / e Å <sup>-3</sup>    | 0.28/-0.30                                                                      |

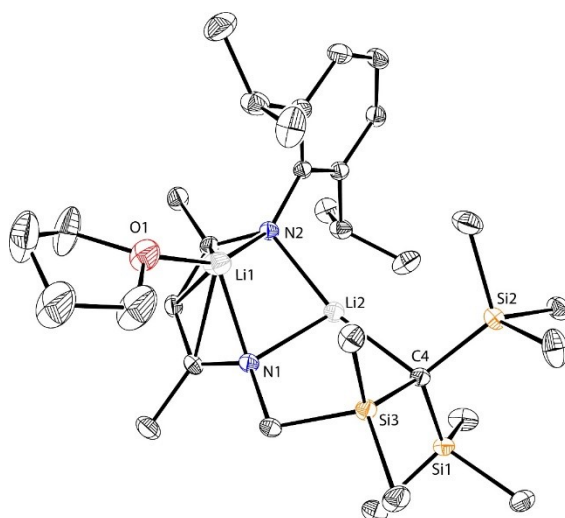

**Figure S34** ORTEP drawing of **3b**. Thermal ellipsoids are shown at the 30% probability level. Hydrogen atoms are omitted for clarity.

**Table S3** Selected Bond Lengths (Å) and Angles (deg) for **3b**.

|                 |            |
|-----------------|------------|
| C(4)—Li(2)      | 2.193(3)   |
| N(1)—Li(2)      | 2.033(3)   |
| N(2)—Li(2)      | 2.088(3)   |
| N(2)—Li(2)—C(4) | 163.75(16) |
| N(1)—Li(2)—C(4) | 101.10(12) |
| N(1)—Li(2)—N(2) | 87.64(11)  |

**Table S4** X-ray crystallographic data for **3b**.

| <b>3b</b>                                      |                                                                                                |
|------------------------------------------------|------------------------------------------------------------------------------------------------|
| CCDC number                                    | 2125716                                                                                        |
| Empirical formula                              | C <sub>62</sub> H <sub>116</sub> Li <sub>4</sub> N <sub>4</sub> O <sub>2</sub> Si <sub>6</sub> |
| Formula weight                                 | 1145.88                                                                                        |
| Temperature/K                                  | 180.00(10)                                                                                     |
| Crystal system                                 | triclinic                                                                                      |
| Space group                                    | P-1                                                                                            |
| a/Å                                            | 10.0442(3)                                                                                     |
| b/Å                                            | 16.4938(4)                                                                                     |
| c/Å                                            | 22.9493(5)                                                                                     |
| $\alpha/^\circ$                                | 77.906(2)                                                                                      |
| $\beta/^\circ$                                 | 84.578(2)                                                                                      |
| $\gamma/^\circ$                                | 75.704(2)                                                                                      |
| Volume/Å <sup>3</sup>                          | 3598.77(16)                                                                                    |
| Z                                              | 2                                                                                              |
| $\rho_{\text{calc}}$ , g/cm <sup>3</sup>       | 1.057                                                                                          |
| $\mu/\text{mm}^{-1}$                           | 0.155                                                                                          |
| F(000)                                         | 1256.0                                                                                         |
| Crystal size/mm <sup>3</sup>                   | 0.2 x 0.2 x 0.2                                                                                |
| Radiation                                      | MoK $\alpha$ ( $\lambda$ = 0.71073)                                                            |
| 2 $\Theta$ range for data collection/ $^\circ$ | 4.384 to 52.044                                                                                |
| Index ranges                                   | -9 $\leq$ h $\leq$ 12, -20 $\leq$ k $\leq$ 20, -28 $\leq$ l $\leq$ 27                          |
| Reflections collected                          | 51412                                                                                          |
| Independent reflections                        | 14186 [ $R_{\text{int}}$ = 0.0246, $R_{\text{sigma}}$ = 0.0247]                                |
| Data/restraints/parameters                     | 14186/0/852                                                                                    |
| Goodness-of-fit on F <sup>2</sup>              | 1.019                                                                                          |
| R <sub>1</sub> [ $I \geq 2\sigma(I)$ ]         | 0.0478                                                                                         |
| wR <sub>2</sub> [all data]                     | 0.1486                                                                                         |
| Largest diff. peak/hole / e Å <sup>-3</sup>    | 0.53/-0.44                                                                                     |

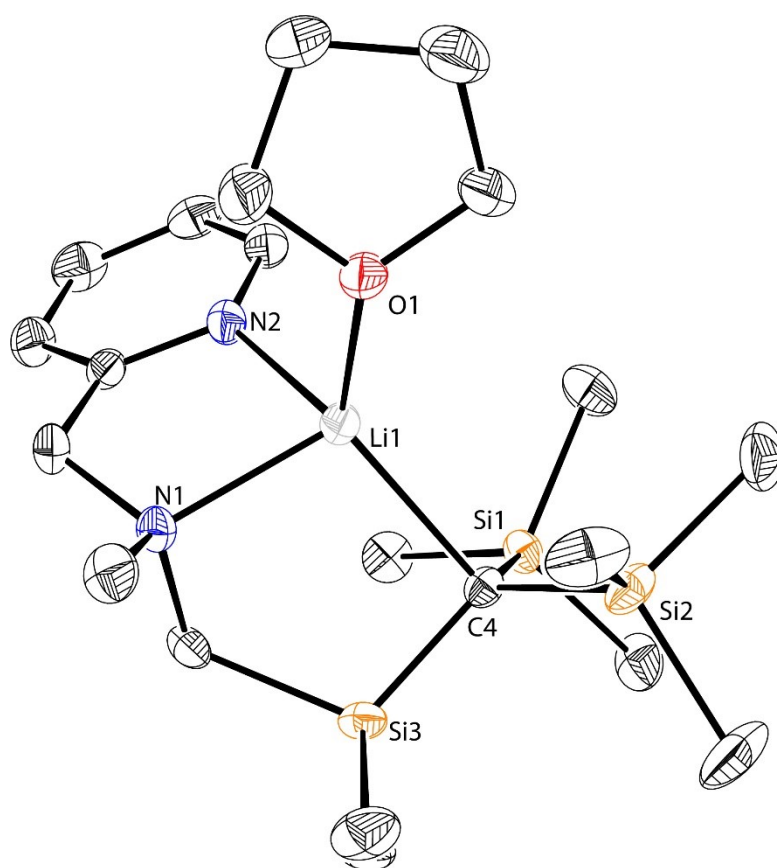

**Figure S35** ORTEP drawing of **3c**. Thermal ellipsoids are shown at the 30% probability level. Hydrogen atoms are omitted for clarity.

**Table S5** Selected Bond Lengths (Å) and Angles (deg) for **3c**.

|                 |            |
|-----------------|------------|
| C(4)—Li(1)      | 2.252(3)   |
| N(1)—Li(1)      | 2.107(3)   |
| N(2)—Li(1)      | 2.121(3)   |
| N(2)—Li(1)—C(4) | 124.70(13) |
| N(1)—Li(1)—C(4) | 102.93(12) |
| N(1)—Li(1)—N(2) | 82.19(11)  |

**Table S6** X-ray crystallographic data for **3c**.

| <b>3c</b>                                      |                                                                        |
|------------------------------------------------|------------------------------------------------------------------------|
| CCDC number                                    | 2125717                                                                |
| Empirical formula                              | C <sub>21</sub> H <sub>43</sub> LiN <sub>2</sub> OSi <sub>3</sub>      |
| Formula weight                                 | 430.78                                                                 |
| Temperature/K                                  | 180.00(10)                                                             |
| Crystal system                                 | orthorhombic                                                           |
| Space group                                    | Pbca                                                                   |
| a/Å                                            | 10.1787(2)                                                             |
| b/Å                                            | 16.4316(4)                                                             |
| c/Å                                            | 31.9451(7)                                                             |
| $\alpha/^\circ$                                | 90                                                                     |
| $\beta/^\circ$                                 | 90                                                                     |
| $\gamma/^\circ$                                | 90                                                                     |
| Volume/Å <sup>3</sup>                          | 5342.9(2)                                                              |
| Z                                              | 8                                                                      |
| $\rho_{\text{calc}}$ , g/cm <sup>3</sup>       | 1.071                                                                  |
| $\mu/\text{mm}^{-1}$                           | 0.191                                                                  |
| F(000)                                         | 1888.0                                                                 |
| Crystal size/mm <sup>3</sup>                   | 0.2 x 0.2 x 0.2                                                        |
| Radiation                                      | MoK $\alpha$ ( $\lambda$ = 0.71073)                                    |
| 2 $\Theta$ range for data collection/ $^\circ$ | 4.746 to 54.958                                                        |
| Index ranges                                   | -13 $\leq$ h $\leq$ 13, -19 $\leq$ k $\leq$ 21, -41 $\leq$ l $\leq$ 41 |
| Reflections collected                          | 70677                                                                  |
| Independent reflections                        | 6106 [ $R_{\text{int}}$ = 0.0426, $R_{\text{sigma}}$ = 0.0232]         |
| Data/restraints/parameters                     | 6106/0/270                                                             |
| Goodness-of-fit on F <sup>2</sup>              | 1.023                                                                  |
| R <sub>1</sub> [ $I \geq 2\sigma(I)$ ]         | 0.0425                                                                 |
| wR <sub>2</sub> [all data]                     | 0.1191                                                                 |
| Largest diff. peak/hole / e Å <sup>-3</sup>    | 0.51/-0.28                                                             |

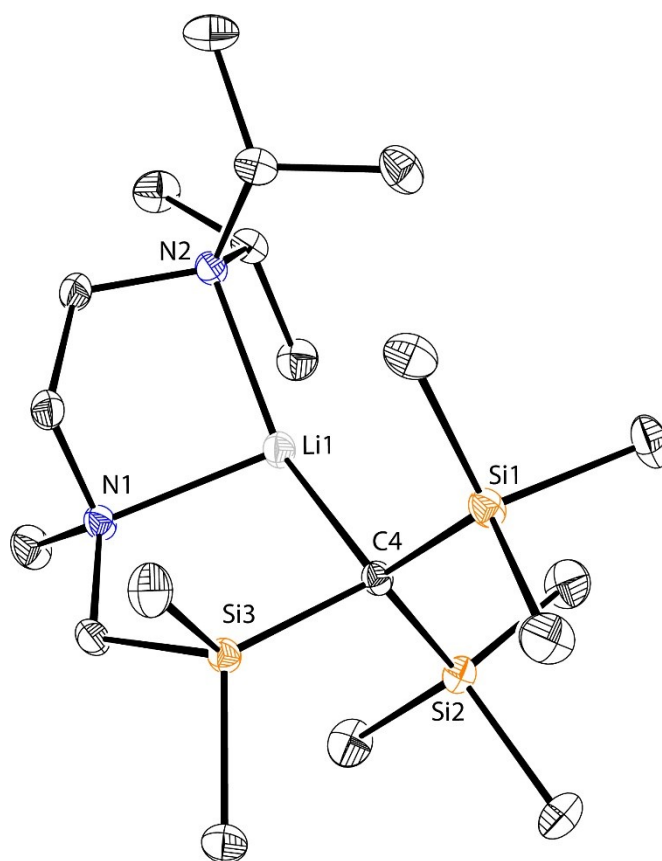

**Figure S36** ORTEP drawing of **3d**. Thermal ellipsoids are shown at the 30% probability level. Hydrogen atoms are omitted for clarity.

**Table S7** Selected Bond Lengths (Å) and Angles (deg) for **3d**.

|                 |            |
|-----------------|------------|
| C(4)—Li(1)      | 2.172(3)   |
| N(1)—Li(1)      | 2.073(2)   |
| N(2)—Li(1)      | 2.146(2)   |
| N(1)—Li(1)—C(4) | 105.04(10) |
| N(2)—Li(1)—C(4) | 149.13(12) |
| N(1)—Li(1)—N(2) | 90.35(9)   |

**Table S8** X-ray crystallographic data for **3d**.

| <b>3d</b>                                   |                                                                  |
|---------------------------------------------|------------------------------------------------------------------|
| CCDC number                                 | 2125718                                                          |
| Empirical formula                           | C <sub>19</sub> H <sub>47</sub> LiN <sub>2</sub> Si <sub>3</sub> |
| Formula weight                              | 394.79                                                           |
| Temperature/K                               | 180.00(10)                                                       |
| Crystal system                              | monoclinic                                                       |
| Space group                                 | P2 <sub>1</sub> /n                                               |
| a/Å                                         | 15.8100(9)                                                       |
| b/Å                                         | 10.4149(4)                                                       |
| c/Å                                         | 16.2663(9)                                                       |
| α/°                                         | 90                                                               |
| β/°                                         | 108.524(6)                                                       |
| γ/°                                         | 90                                                               |
| Volume/Å <sup>3</sup>                       | 2539.6(2)                                                        |
| Z                                           | 4                                                                |
| ρ <sub>calc</sub> , g/cm <sup>3</sup>       | 1.033                                                            |
| μ/mm <sup>-1</sup>                          | 0.192                                                            |
| F(000)                                      | 880.0                                                            |
| Crystal size/mm <sup>3</sup>                | 0.2 x 0.2 x 0.2                                                  |
| Radiation                                   | MoKα (λ = 0.71073)                                               |
| 2θ range for data collection/°              | 4.762 to 54.968                                                  |
| Index ranges                                | -20 ≤ h ≤ 20, -12 ≤ k ≤ 13, -21 ≤ l ≤ 21                         |
| Reflections collected                       | 28387                                                            |
| Independent reflections                     | 5804 [R <sub>int</sub> = 0.0418, R <sub>sigma</sub> = 0.0330]    |
| Data/restraints/parameters                  | 5804/0/239                                                       |
| Goodness-of-fit on F <sup>2</sup>           | 1.040                                                            |
| R <sub>1</sub> [I >= 2σ (I)]                | 0.0348                                                           |
| wR <sub>2</sub> [all data]                  | 0.0993                                                           |
| Largest diff. peak/hole / e Å <sup>-3</sup> | 0.29/-0.20                                                       |

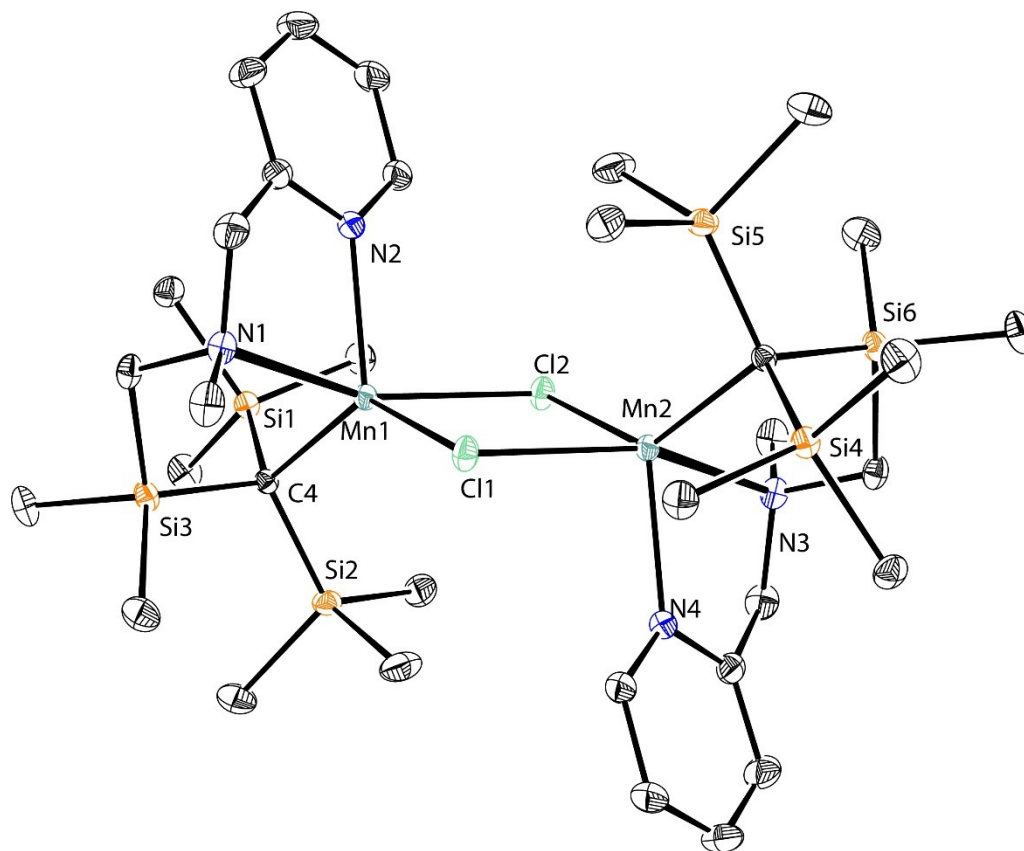

**Figure S37** ORTEP drawing of **4**. Thermal ellipsoids are shown at the 30% probability level. Hydrogen atoms are omitted for clarity.

**Table S9** Selected Bond Lengths (Å) and Angles (deg) for **4**.

|                   |            |
|-------------------|------------|
| Mn(1)—Cl(1)       | 2.4810(6)  |
| Mn(1)—Cl(2)       | 2.5474(6)  |
| Mn(1)—N(1)        | 2.3895(17) |
| Mn(1)—N(2)        | 2.2366(16) |
| Mn(1)—C(4)        | 2.2274(19) |
| Cl(1)—Mn(1)—Cl(2) | 83.34(2)   |

**Table S10** X-ray crystallographic data for **4**.

| <b>4</b>                                       |                                                                                                |
|------------------------------------------------|------------------------------------------------------------------------------------------------|
| CCDC number                                    | 2125719                                                                                        |
| Empirical formula                              | C <sub>34</sub> H <sub>70</sub> Cl <sub>2</sub> Mn <sub>2</sub> N <sub>4</sub> Si <sub>6</sub> |
| Formula weight                                 | 884.26                                                                                         |
| Temperature/K                                  | 180.00(10)                                                                                     |
| Crystal system                                 | triclinic                                                                                      |
| Space group                                    | P-1                                                                                            |
| a/Å                                            | 9.0194(6)                                                                                      |
| b/Å                                            | 10.6298(5)                                                                                     |
| c/Å                                            | 13.1801(8)                                                                                     |
| $\alpha/^\circ$                                | 74.912(5)                                                                                      |
| $\beta/^\circ$                                 | 73.834(6)                                                                                      |
| $\gamma/^\circ$                                | 77.514(4)                                                                                      |
| Volume/Å <sup>3</sup>                          | 1157.67(13)                                                                                    |
| Z                                              | 1                                                                                              |
| $\rho_{\text{calc}}$ , g/cm <sup>3</sup>       | 1.268                                                                                          |
| $\mu/\text{mm}^{-1}$                           | 0.844                                                                                          |
| F(000)                                         | 470.0                                                                                          |
| Crystal size/mm <sup>3</sup>                   | 0.2 x 0.1 x 0.1                                                                                |
| Radiation                                      | MoK $\alpha$ ( $\lambda$ = 0.71073)                                                            |
| 2 $\Theta$ range for data collection/ $^\circ$ | 5.11 to 54.97                                                                                  |
| Index ranges                                   | -11 $\leq$ h $\leq$ 11, -13 $\leq$ k $\leq$ 13, -17 $\leq$ l $\leq$ 17                         |
| Reflections collected                          | 9187                                                                                           |
| Independent reflections                        | 9187 [R <sub>int</sub> = ?, R <sub>sigma</sub> = 0.0449]                                       |
| Data/restraints/parameters                     | 9187/0/227                                                                                     |
| Goodness-of-fit on F <sup>2</sup>              | 0.985                                                                                          |
| R <sub>1</sub> [ $I \geq 2\sigma(I)$ ]         | 0.0313                                                                                         |
| wR <sub>2</sub> [all data]                     | 0.0738                                                                                         |
| Largest diff. peak/hole / e Å <sup>-3</sup>    | 0.33/-0.28                                                                                     |

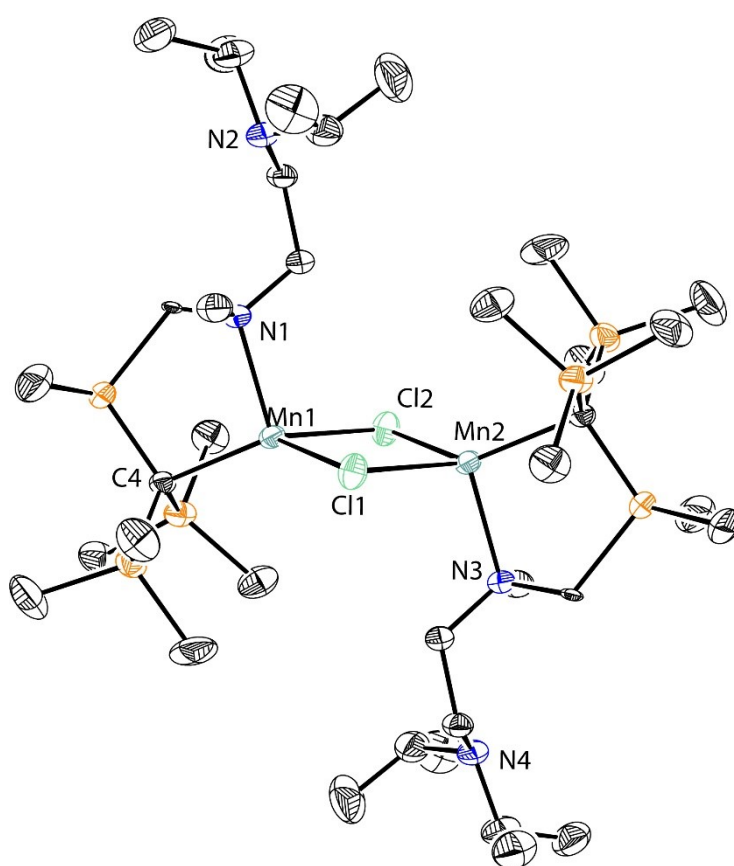

**Figure S38** ORTEP drawing of **5**. Thermal ellipsoids are shown at the 30% probability level. Hydrogen atoms are omitted for clarity.

**Table S11** Selected Bond Lengths (Å) and Angles (deg) for **5**.

|                   |           |
|-------------------|-----------|
| Mn(1)—Cl(1)       | 2.4274(8) |
| Mn(1)—Cl(2)       | 2.4468(9) |
| Mn(1)—N(1)        | 2.204(5)  |
| Mn(1)—C(4)        | 2.160(3)  |
| Cl(1)—Mn(1)—Cl(2) | 89.87(3)  |

**Table S12** X-ray crystallographic data for **5**.

| <b>5</b>                                       |                                                                                                |
|------------------------------------------------|------------------------------------------------------------------------------------------------|
| CCDC number                                    | 2125720                                                                                        |
| Empirical formula                              | C <sub>38</sub> H <sub>94</sub> Cl <sub>2</sub> Mn <sub>2</sub> N <sub>4</sub> Si <sub>6</sub> |
| Formula weight                                 | 956.49                                                                                         |
| Temperature/K                                  | 180.00(10)                                                                                     |
| Crystal system                                 | triclinic                                                                                      |
| Space group                                    | P-1                                                                                            |
| a/Å                                            | 9.1109(4)                                                                                      |
| b/Å                                            | 12.3473(5)                                                                                     |
| c/Å                                            | 12.7686(6)                                                                                     |
| $\alpha/^\circ$                                | 101.770(4)                                                                                     |
| $\beta/^\circ$                                 | 92.549(4)                                                                                      |
| $\gamma/^\circ$                                | 99.528(3)                                                                                      |
| Volume/Å <sup>3</sup>                          | 1382.24(11)                                                                                    |
| Z                                              | 1                                                                                              |
| $\rho_{\text{calc}}$ , g/cm <sup>3</sup>       | 1.149                                                                                          |
| $\mu/\text{mm}^{-1}$                           | 0.711                                                                                          |
| F(000)                                         | 518.0                                                                                          |
| Crystal size/mm <sup>3</sup>                   | 0.1 x 0.1 x 0.1                                                                                |
| Radiation                                      | MoK $\alpha$ ( $\lambda$ = 0.71073)                                                            |
| 2 $\theta$ range for data collection/ $^\circ$ | 5.182 to 54.964                                                                                |
| Index ranges                                   | -11 $\leq$ h $\leq$ 11, -15 $\leq$ k $\leq$ 16, -16 $\leq$ l $\leq$ 16                         |
| Reflections collected                          | 25253                                                                                          |
| Independent reflections                        | 6323 [ $R_{\text{int}}$ = 0.0287, $R_{\text{sigma}}$ = 0.0244]                                 |
| Data/restraints/parameters                     | 6323/96/324                                                                                    |
| Goodness-of-fit on F <sup>2</sup>              | 1.071                                                                                          |
| R <sub>1</sub> [ $ I  \geq 2\sigma(I)$ ]       | 0.0543                                                                                         |
| wR <sub>2</sub> [all data]                     | 0.1504                                                                                         |
| Largest diff. peak/hole / e Å <sup>-3</sup>    | 1.40/-0.36                                                                                     |

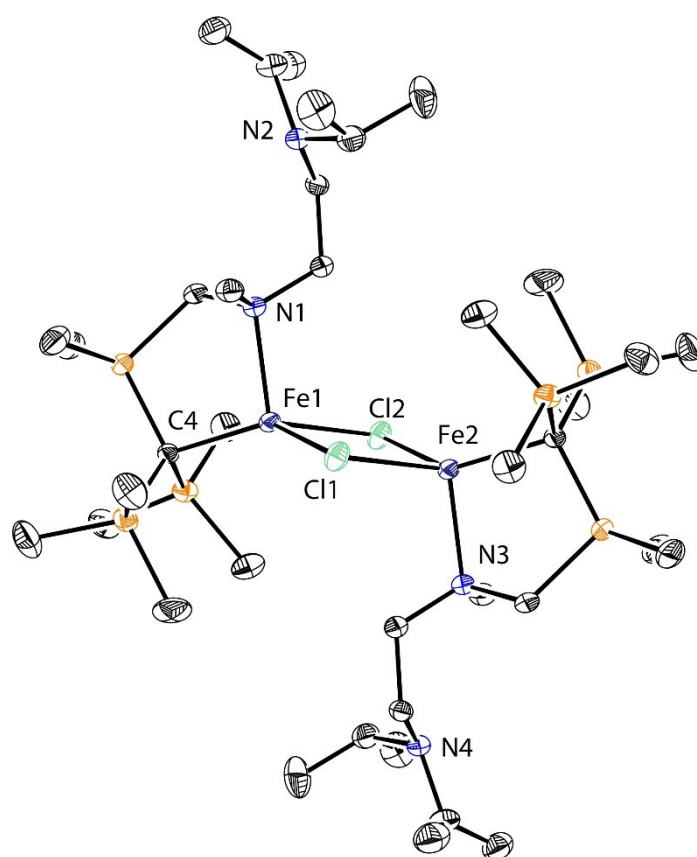

**Figure S39** ORTEP drawing of **6**. Thermal ellipsoids are shown at the 30% probability level. Hydrogen atoms are omitted for clarity.

**Table S13** Selected Bond Lengths (Å) and Angles (deg) for **6**.

|                   |           |
|-------------------|-----------|
| Fe(1)—Cl(1)       | 2.3871(6) |
| Fe(1)—Cl(2)       | 2.4140(6) |
| Fe(1)—N(1)        | 2.154(3)  |
| Fe(1)—C(4)        | 2.084(2)  |
| Cl(1)—Fe(1)—Cl(2) | 87.50(2)  |

**Table S14** X-ray crystallographic data for **6**.

| <b>6</b>                                       |                                                                                                |
|------------------------------------------------|------------------------------------------------------------------------------------------------|
| CCDC number                                    | 2125721                                                                                        |
| Empirical formula                              | C <sub>38</sub> H <sub>94</sub> Cl <sub>2</sub> Fe <sub>2</sub> N <sub>4</sub> Si <sub>6</sub> |
| Formula weight                                 | 958.31                                                                                         |
| Temperature/K                                  | 179.99(10)                                                                                     |
| Crystal system                                 | triclinic                                                                                      |
| Space group                                    | P-1                                                                                            |
| a/Å                                            | 9.0648(5)                                                                                      |
| b/Å                                            | 12.2798(7)                                                                                     |
| c/Å                                            | 12.6473(7)                                                                                     |
| $\alpha/^\circ$                                | 100.964(5)                                                                                     |
| $\beta/^\circ$                                 | 92.641(4)                                                                                      |
| $\gamma/^\circ$                                | 99.343(5)                                                                                      |
| Volume/Å <sup>3</sup>                          | 1359.48(13)                                                                                    |
| Z                                              | 1                                                                                              |
| $\rho_{\text{calc}}$ , g/cm <sup>3</sup>       | 1.171                                                                                          |
| $\mu/\text{mm}^{-1}$                           | 0.792                                                                                          |
| F(000)                                         | 520.0                                                                                          |
| Crystal size/mm <sup>3</sup>                   | 0.1 x 0.1 x 0.1                                                                                |
| Radiation                                      | MoK $\alpha$ ( $\lambda$ = 0.71073)                                                            |
| 2 $\Theta$ range for data collection/ $^\circ$ | 5.21 to 54.968                                                                                 |
| Index ranges                                   | -10 $\leq$ h $\leq$ 11, -15 $\leq$ k $\leq$ 14, -16 $\leq$ l $\leq$ 16                         |
| Reflections collected                          | 23073                                                                                          |
| Independent reflections                        | 6225 [ $R_{\text{int}}$ = 0.0438, $R_{\text{sigma}}$ = 0.0457]                                 |
| Data/restraints/parameters                     | 6225/138/307                                                                                   |
| Goodness-of-fit on F <sup>2</sup>              | 1.037                                                                                          |
| R <sub>1</sub> [ $I > 2\sigma(I)$ ]            | 0.0395                                                                                         |
| wR <sub>2</sub> [all data]                     | 0.0918                                                                                         |
| Largest diff. peak/hole / e Å <sup>-3</sup>    | 0.42/-0.42                                                                                     |

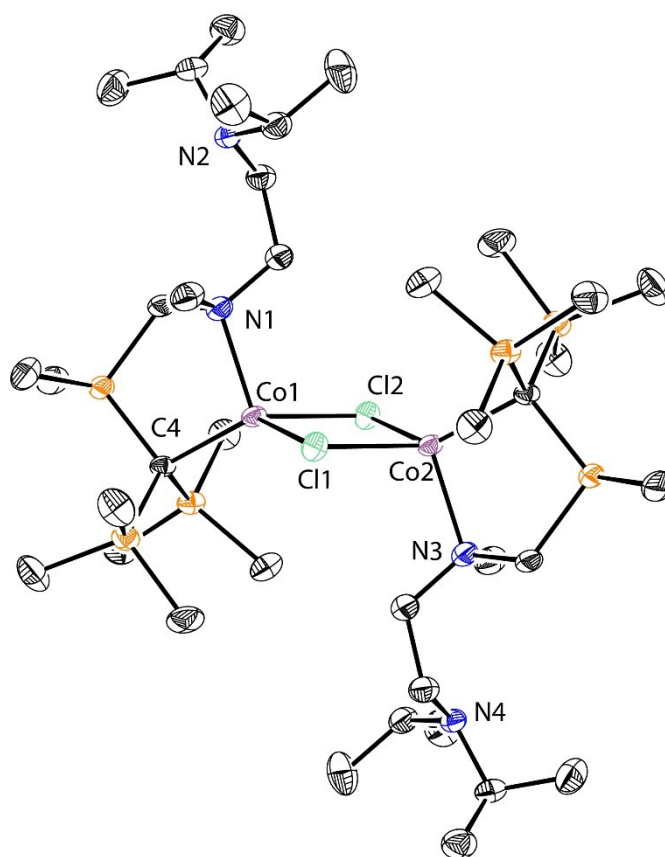

**Figure S40** ORTEP drawing of **7**. Thermal ellipsoids are shown at the 30% probability level. Hydrogen atoms are omitted for clarity.

**Table S15** Selected Bond Lengths (Å) and Angles (deg) for **7**.

|                   |            |
|-------------------|------------|
| Co(1)—Cl(1)       | 2.3484(10) |
| Co(1)—Cl(2)       | 2.3640(12) |
| Co(1)—N(1)        | 2.087(4)   |
| Co(1)—C(4)        | 2.071(4)   |
| Cl(1)—Co(1)—Cl(2) | 88.41(4)   |

**Table S16** X-ray crystallographic data for **7**.

| 7                                           |                                                                                                |
|---------------------------------------------|------------------------------------------------------------------------------------------------|
| CCDC number                                 | 2125722                                                                                        |
| Empirical formula                           | C <sub>38</sub> H <sub>94</sub> Cl <sub>2</sub> Co <sub>2</sub> N <sub>4</sub> Si <sub>6</sub> |
| Formula weight                              | 964.47                                                                                         |
| Temperature/K                               | 179.99(10)                                                                                     |
| Crystal system                              | triclinic                                                                                      |
| Space group                                 | P-1                                                                                            |
| a/Å                                         | 9.0540(6)                                                                                      |
| b/Å                                         | 12.2175(7)                                                                                     |
| c/Å                                         | 12.6523(8)                                                                                     |
| α/°                                         | 100.857(5)                                                                                     |
| β/°                                         | 92.800(5)                                                                                      |
| γ/°                                         | 99.344(5)                                                                                      |
| Volume/Å <sup>3</sup>                       | 1351.71(15)                                                                                    |
| Z                                           | 1                                                                                              |
| ρ <sub>calc</sub> , g/cm <sup>3</sup>       | 1.185                                                                                          |
| μ/mm <sup>-1</sup>                          | 0.874                                                                                          |
| F(000)                                      | 522.0                                                                                          |
| Crystal size/mm <sup>3</sup>                | 0.1 x 0.1 x 0.1                                                                                |
| Radiation                                   | MoKα (λ = 0.71073)                                                                             |
| 2θ range for data collection/°              | 5.218 to 54.968                                                                                |
| Index ranges                                | -11 ≤ h ≤ 11, -15 ≤ k ≤ 15, -16 ≤ l ≤ 16                                                       |
| Reflections collected                       | 24454                                                                                          |
| Independent reflections                     | 6194 [R <sub>int</sub> = 0.0543, R <sub>sigma</sub> = 0.0424]                                  |
| Data/restraints/parameters                  | 6194/0/248                                                                                     |
| Goodness-of-fit on F <sup>2</sup>           | 1.070                                                                                          |
| R <sub>1</sub> [ I  > 2σ( I )]              | 0.0678                                                                                         |
| wR <sub>2</sub> [all data]                  | 0.1819                                                                                         |
| Largest diff. peak/hole / e Å <sup>-3</sup> | 1.27/-0.44                                                                                     |

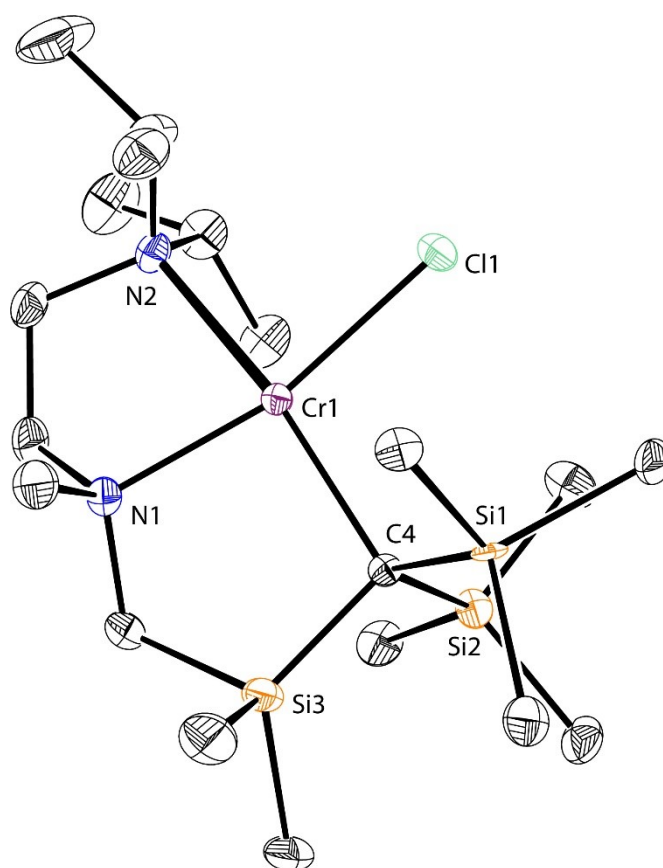

**Figure S41** ORTEP drawing of **8**. Thermal ellipsoids are shown at the 30% probability level. Hydrogen atoms are omitted for clarity.

**Table S17** Selected Bond Lengths (Å) and Angles (deg) for **8**.

|                  |            |
|------------------|------------|
| C(4)—Cr(1)       | 2.221(3)   |
| N(1)—Cr(1)       | 2.139(3)   |
| N(2)—Cr(1)       | 2.293(3)   |
| Cr(1)—Cl(1)      | 2.3478(10) |
| N(1)—Cr(1)—Cl(1) | 165.94(9)  |
| N(1)—Cr(1)—C(4)  | 92.36(12)  |
| N(2)—Cr(1)—C(4)  | 168.35(12) |
| N(1)—Cr(1)—N(2)  | 80.91(11)  |
| N(2)—Cr(1)—Cl(1) | 89.15(9)   |
| C(4)—Cr(1)—Cl(1) | 99.00(9)   |

**Table S18** X-ray crystallographic data for **8**.

| <b>8</b>                                       |                                                                        |
|------------------------------------------------|------------------------------------------------------------------------|
| CCDC number                                    | 2125723                                                                |
| Empirical formula                              | C <sub>19</sub> H <sub>47</sub> ClCrN <sub>2</sub> Si <sub>3</sub>     |
| Formula weight                                 | 475.30                                                                 |
| Temperature/K                                  | 180.00(10)                                                             |
| Crystal system                                 | orthorhombic                                                           |
| Space group                                    | Pca21                                                                  |
| a/Å                                            | 14.9573(6)                                                             |
| b/Å                                            | 12.5606(4)                                                             |
| c/Å                                            | 14.2562(5)                                                             |
| $\alpha/^\circ$                                | 90                                                                     |
| $\beta/^\circ$                                 | 90                                                                     |
| $\gamma/^\circ$                                | 90                                                                     |
| Volume/Å <sup>3</sup>                          | 2678.35(17)                                                            |
| Z                                              | 4                                                                      |
| $\rho_{\text{calc}}$ , g/cm <sup>3</sup>       | 1.179                                                                  |
| $\mu/\text{mm}^{-1}$                           | 0.668                                                                  |
| F(000)                                         | 1032.0                                                                 |
| Crystal size/mm <sup>3</sup>                   | 0.2 x 0.2 x 0.2                                                        |
| Radiation                                      | MoK $\alpha$ ( $\lambda$ = 0.71073)                                    |
| 2 $\Theta$ range for data collection/ $^\circ$ | 5.448 to 54.96                                                         |
| Index ranges                                   | -19 $\leq$ h $\leq$ 17, -16 $\leq$ k $\leq$ 16, -18 $\leq$ l $\leq$ 18 |
| Reflections collected                          | 20081                                                                  |
| Independent reflections                        | 6010 [ $R_{\text{int}}$ = 0.0337, $R_{\text{sigma}}$ = 0.0345]         |
| Data/restraints/parameters                     | 6010/258/318                                                           |
| Goodness-of-fit on F <sup>2</sup>              | 1.050                                                                  |
| R <sub>1</sub> [ $I \geq 2\sigma(I)$ ]         | 0.0413                                                                 |
| wR <sub>2</sub> [all data]                     | 0.1074                                                                 |
| Largest diff. peak/hole / e Å <sup>-3</sup>    | 1.05/-0.28                                                             |
| Flack parameter                                | 0.48(3)                                                                |

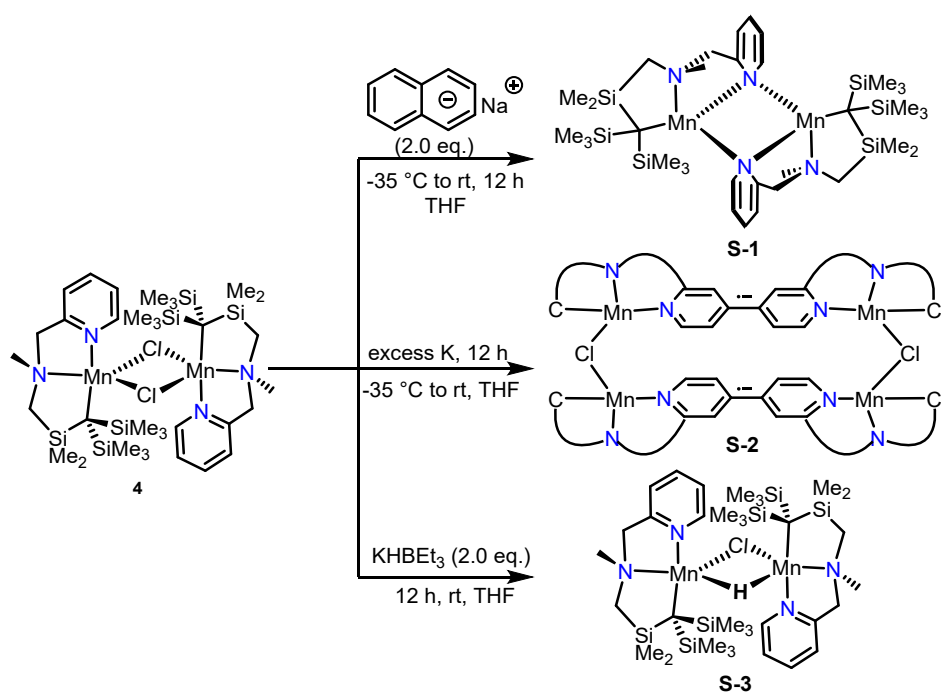

**Figure S42** Preliminary applications of **4**.

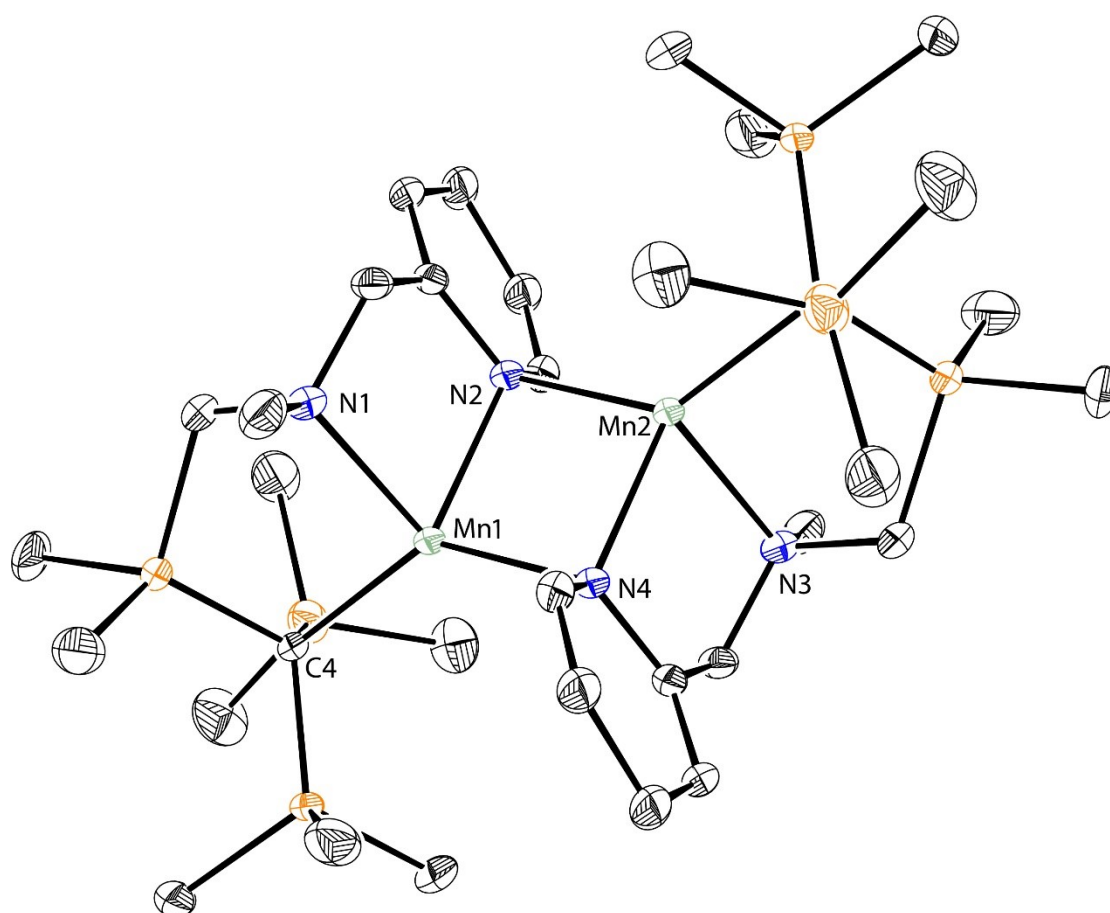

**Figure S43** ORTEP drawing of **S-1**. Thermal ellipsoids are shown at the 30% probability level. Hydrogen atoms are omitted for clarity.

**Table S19** Selected Bond Lengths (Å) and Angles (deg) for **S-1**.

|             |            |
|-------------|------------|
| Mn(1)—N(1)  | 2.287(4)   |
| Mn(1)—N(2)  | 2.180(4)   |
| Mn(1)—Mn(2) | 3.0387(17) |
| Mn(1)—C(4)  | 2.186(4)   |

**Table S20** X-ray crystallographic data for **S-1**.

| <b>S-1</b>                                     |                                                                                |
|------------------------------------------------|--------------------------------------------------------------------------------|
| CCDC number                                    | 2150103                                                                        |
| Empirical formula                              | C <sub>34</sub> H <sub>70</sub> Mn <sub>2</sub> N <sub>4</sub> Si <sub>6</sub> |
| Formula weight                                 | 813.36                                                                         |
| Temperature/K                                  | 180.00(10)                                                                     |
| Crystal system                                 | triclinic                                                                      |
| Space group                                    | P-1                                                                            |
| a/Å                                            | 9.5513(10)                                                                     |
| b/Å                                            | 10.1949(9)                                                                     |
| c/Å                                            | 12.0621(11)                                                                    |
| $\alpha/^\circ$                                | 90.403(7)                                                                      |
| $\beta/^\circ$                                 | 102.656(8)                                                                     |
| $\gamma/^\circ$                                | 103.957(8)                                                                     |
| Volume/Å <sup>3</sup>                          | 1109.94(19)                                                                    |
| Z                                              | 1                                                                              |
| $\rho_{\text{calc}}$ , g/cm <sup>3</sup>       | 1.217                                                                          |
| $\mu/\text{mm}^{-1}$                           | 0.758                                                                          |
| F(000)                                         | 436.0                                                                          |
| Crystal size/mm <sup>3</sup>                   | 0.1 x 0.1 x 0.1                                                                |
| Radiation                                      | MoK $\alpha$ ( $\lambda$ = 0.71073)                                            |
| 2 $\Theta$ range for data collection/ $^\circ$ | 5.22 to 52.038                                                                 |
| Index ranges                                   | -11 $\leq$ h $\leq$ 10, -12 $\leq$ k $\leq$ 12, -14 $\leq$ l $\leq$ 14         |
| Reflections collected                          | 13545                                                                          |
| Independent reflections                        | 4357 [ $R_{\text{int}}$ = 0.0483, $R_{\text{sigma}}$ = 0.0494]                 |
| Data/restraints/parameters                     | 4357/0/217                                                                     |
| Goodness-of-fit on F <sup>2</sup>              | 1.127                                                                          |
| R <sub>1</sub> [ $ I  > 2\sigma(I)$ ]          | 0.0665                                                                         |
| wR <sub>2</sub> [all data]                     | 0.1669                                                                         |
| Largest diff. peak/hole / e Å <sup>-3</sup>    | 1.39/-0.43                                                                     |

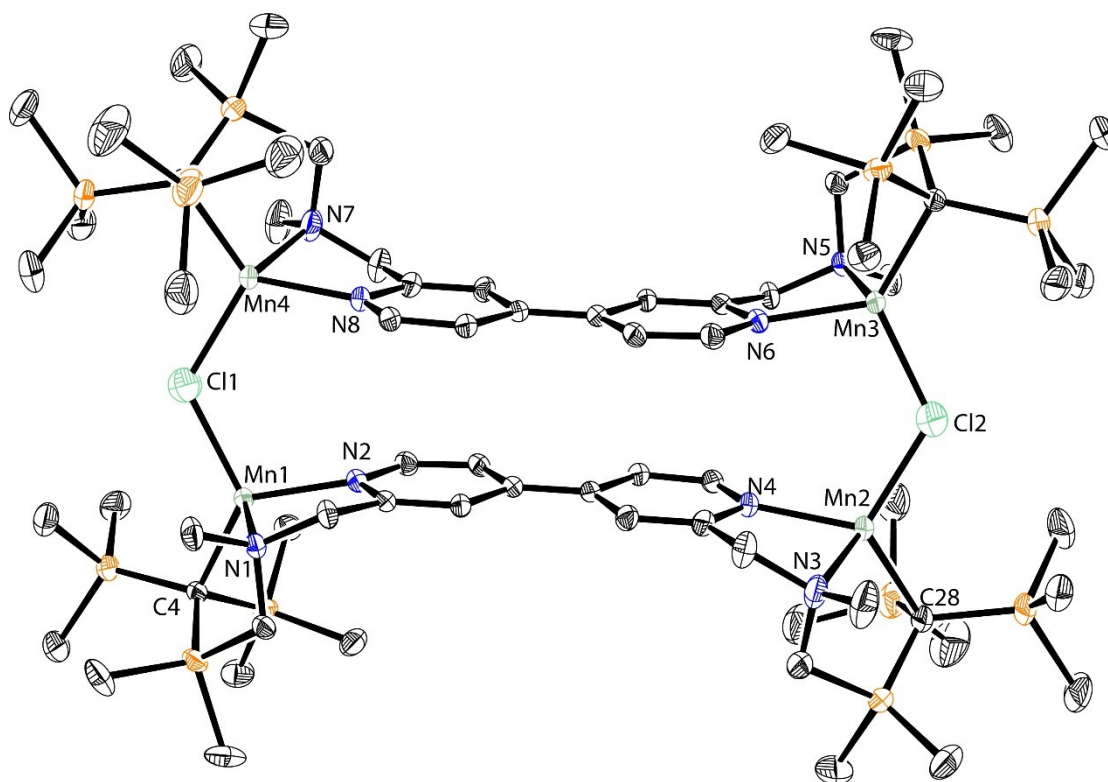

**Figure S44** ORTEP drawing of **S-2**. Thermal ellipsoids are shown at the 30% probability level. Hydrogen atoms are omitted for clarity.

**Table S21** Selected Bond Lengths (Å) and Angles (deg) for **S-2**.

|             |           |
|-------------|-----------|
| Mn(1)—N(1)  | 2.225(3)  |
| Mn(1)—N(2)  | 2.115(3)  |
| Mn(1)—Cl(1) | 2.346(15) |
| Mn(1)—C(4)  | 2.174(3)  |
| Mn(2)—N(3)  | 2.220(4)  |
| Mn(2)—N(4)  | 2.131(3)  |
| Mn(2)—Cl(2) | 2.307(14) |
| Mn(2)—C(28) | 2.158(4)  |

**Table S22** X-ray crystallographic data for **S-2**.

| S-2                                         |                                                                                                  |
|---------------------------------------------|--------------------------------------------------------------------------------------------------|
| CCDC number                                 | 2150104                                                                                          |
| Empirical formula                           | C <sub>80</sub> H <sub>164</sub> Cl <sub>2</sub> Mn <sub>4</sub> N <sub>8</sub> Si <sub>12</sub> |
| Formula weight                              | 1865.92                                                                                          |
| Temperature/K                               | 180.00(10)                                                                                       |
| Crystal system                              | triclinic                                                                                        |
| Space group                                 | P-1                                                                                              |
| a/Å                                         | 10.4374(6)                                                                                       |
| b/Å                                         | 15.6526(8)                                                                                       |
| c/Å                                         | 18.7151(10)                                                                                      |
| α/°                                         | 107.997(5)                                                                                       |
| β/°                                         | 105.323(5)                                                                                       |
| γ/°                                         | 101.251(5)                                                                                       |
| Volume/Å <sup>3</sup>                       | 2673.9(3)                                                                                        |
| Z                                           | 1                                                                                                |
| ρ <sub>calc</sub> , g/cm <sup>3</sup>       | 1.159                                                                                            |
| μ/mm <sup>-1</sup>                          | 0.686                                                                                            |
| F(000)                                      | 1002.0                                                                                           |
| Crystal size/mm <sup>3</sup>                | 0.1 x 0.1 x 0.1                                                                                  |
| Radiation                                   | MoKα (λ = 0.71073)                                                                               |
| 2θ range for data collection/°              | 4.624 to 54.968                                                                                  |
| Index ranges                                | -11 ≤ h ≤ 13, -20 ≤ k ≤ 20, -23 ≤ l ≤ 24                                                         |
| Reflections collected                       | 51851                                                                                            |
| Independent reflections                     | 12256 [R <sub>int</sub> = 0.0597, R <sub>sigma</sub> = 0.0475]                                   |
| Data/restraints/parameters                  | 12256/102/545                                                                                    |
| Goodness-of-fit on F <sup>2</sup>           | 1.053                                                                                            |
| R <sub>1</sub> [I ≥ 2σ (I)]                 | 0.0719                                                                                           |
| wR <sub>2</sub> [all data]                  | 0.2100                                                                                           |
| Largest diff. peak/hole / e Å <sup>-3</sup> | 1.60/-0.65                                                                                       |

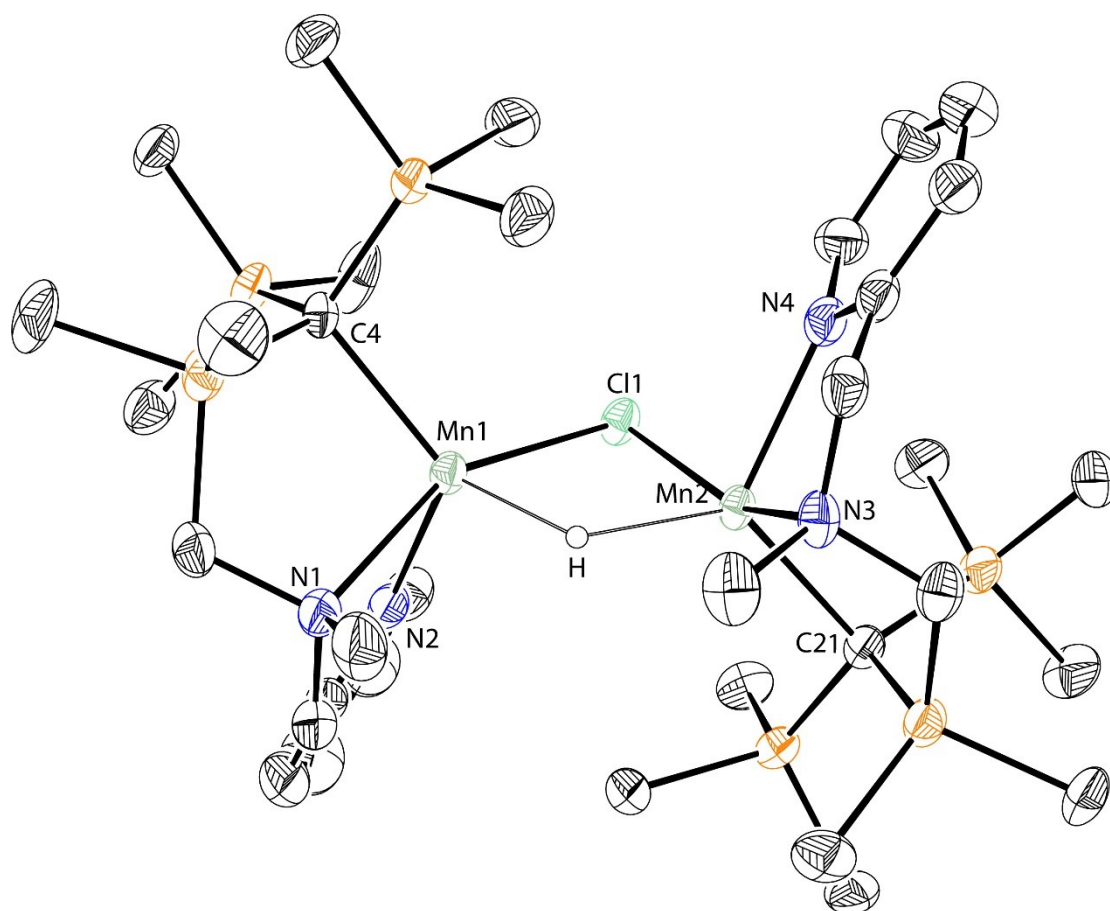

**Figure S45** ORTEP drawing of **S-3**. Thermal ellipsoids are shown at the 30% probability level. Hydrogen atoms are omitted for clarity.

**Table S23** Selected Bond Lengths (Å) and Angles (deg) for **S-3**.

|             |            |
|-------------|------------|
| Mn(1)—N(1)  | 2.365(5)   |
| Mn(1)—N(2)  | 2.236(5)   |
| Mn(1)—Cl(1) | 2.5824(16) |
| Mn(1)—C(4)  | 2.240(6)   |
| Mn(2)—N(3)  | 2.357(5)   |
| Mn(2)—N(4)  | 2.268(5)   |
| Mn(2)—Cl(1) | 2.5376(17) |
| Mn(2)—C(21) | 2.255(6)   |

**Table S24** X-ray crystallographic data for **S-3**.

| <b>S-3</b>                                     |                                                                                  |
|------------------------------------------------|----------------------------------------------------------------------------------|
| CCDC number                                    | 2150105                                                                          |
| Empirical formula                              | C <sub>34</sub> H <sub>71</sub> ClMn <sub>2</sub> N <sub>4</sub> Si <sub>6</sub> |
| Formula weight                                 | 849.81                                                                           |
| Temperature/K                                  | 180.00(10)                                                                       |
| Crystal system                                 | triclinic                                                                        |
| Space group                                    | P-1                                                                              |
| a/Å                                            | 9.3689(9)                                                                        |
| b/Å                                            | 14.5884(11)                                                                      |
| c/Å                                            | 21.1472(12)                                                                      |
| $\alpha/^\circ$                                | 69.939(6)                                                                        |
| $\beta/^\circ$                                 | 86.262(7)                                                                        |
| $\gamma/^\circ$                                | 74.947(7)                                                                        |
| Volume/Å <sup>3</sup>                          | 2620.9(4)                                                                        |
| Z                                              | 2                                                                                |
| $\rho_{\text{calc}}$ , g/cm <sup>3</sup>       | 1.077                                                                            |
| $\mu/\text{mm}^{-1}$                           | 0.694                                                                            |
| F(000)                                         | 908.0                                                                            |
| Crystal size/mm <sup>3</sup>                   | 0.2 x 0.2 x 0.2                                                                  |
| Radiation                                      | MoK $\alpha$ ( $\lambda$ = 0.71073)                                              |
| 2 $\theta$ range for data collection/ $^\circ$ | 4.9 to 50.054                                                                    |
| Index ranges                                   | -11 $\leq$ h $\leq$ 11, -17 $\leq$ k $\leq$ 17, -25 $\leq$ l $\leq$ 25           |
| Reflections collected                          | 39170                                                                            |
| Independent reflections                        | 9248 [R <sub>int</sub> = 0.0771, R <sub>sigma</sub> = 0.0615]                    |
| Data/restraints/parameters                     | 9248/0/446                                                                       |
| Goodness-of-fit on F <sup>2</sup>              | 1.075                                                                            |
| R <sub>1</sub> [ $I \geq 2\sigma(I)$ ]         | 0.0828                                                                           |
| wR <sub>2</sub> [all data]                     | 0.2237                                                                           |
| Largest diff. peak/hole / e Å <sup>-3</sup>    | 0.94/-0.76                                                                       |

**4) IR Spectra for 3a-d, 4-8**

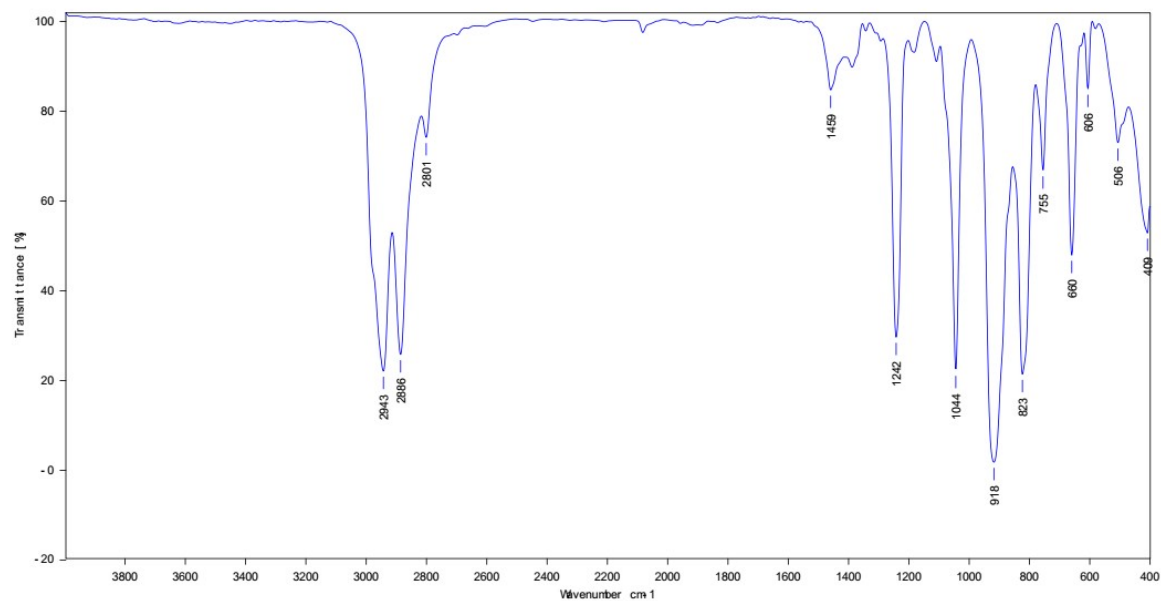

**Figure S46** IR spectrum of **3a** in KBr pellet at room temperature.

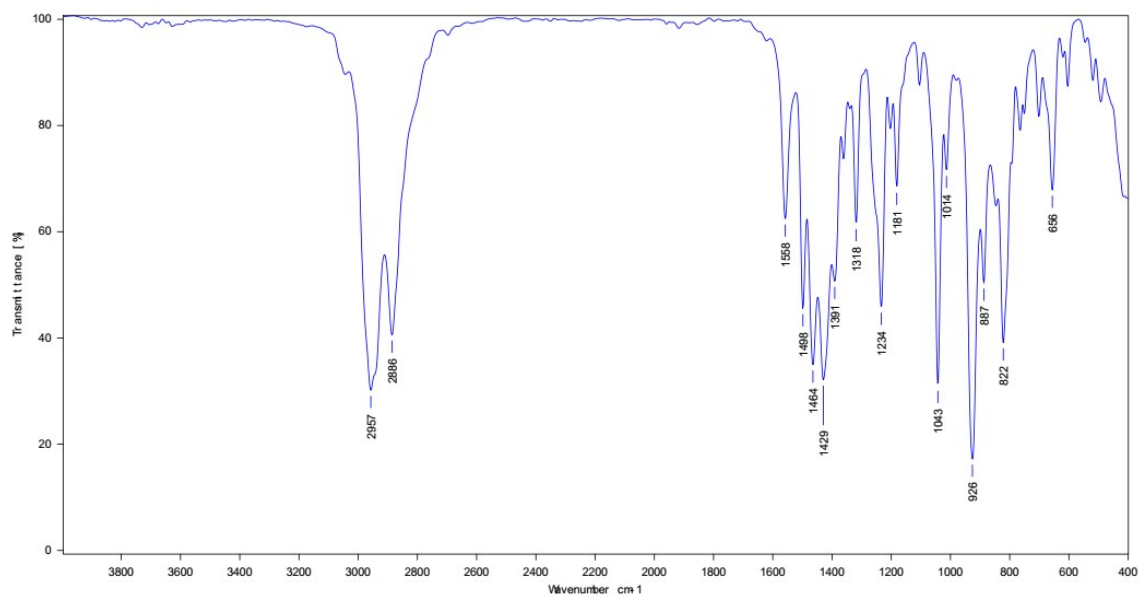

**Figure S47** IR spectrum of **3b** in KBr pellet at room temperature.

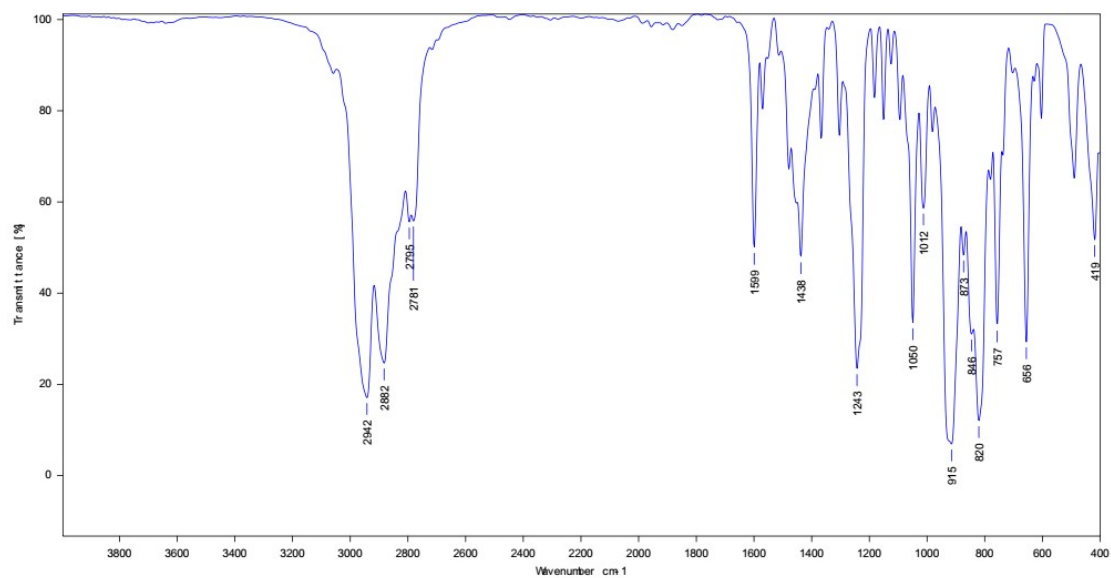

**Figure S48** IR spectrum of **3c** in KBr pellet at room temperature.

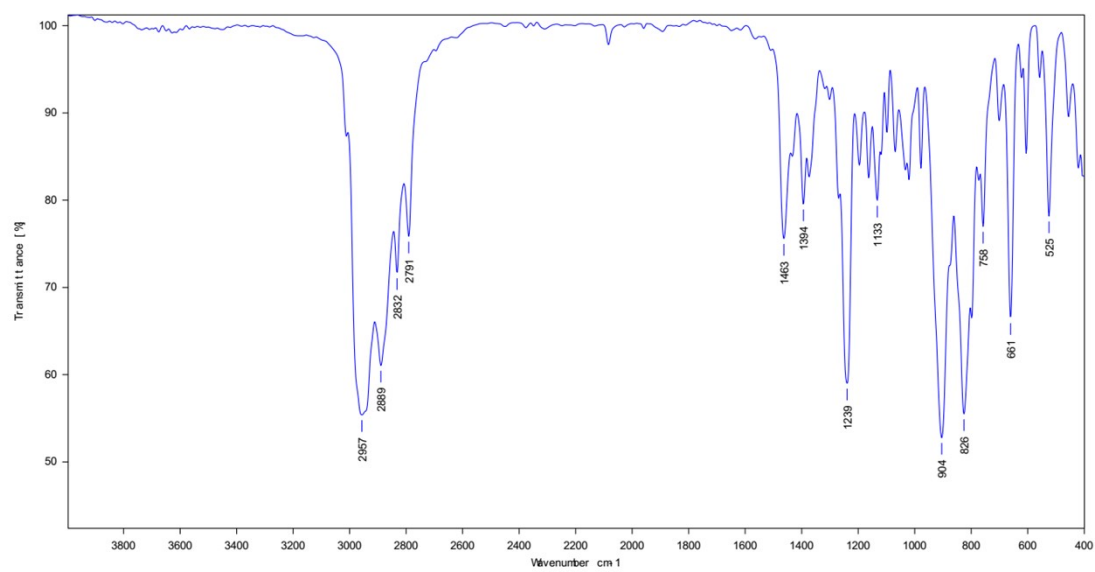

**Figure S49** IR spectrum of **3d** in KBr pellet at room temperature.

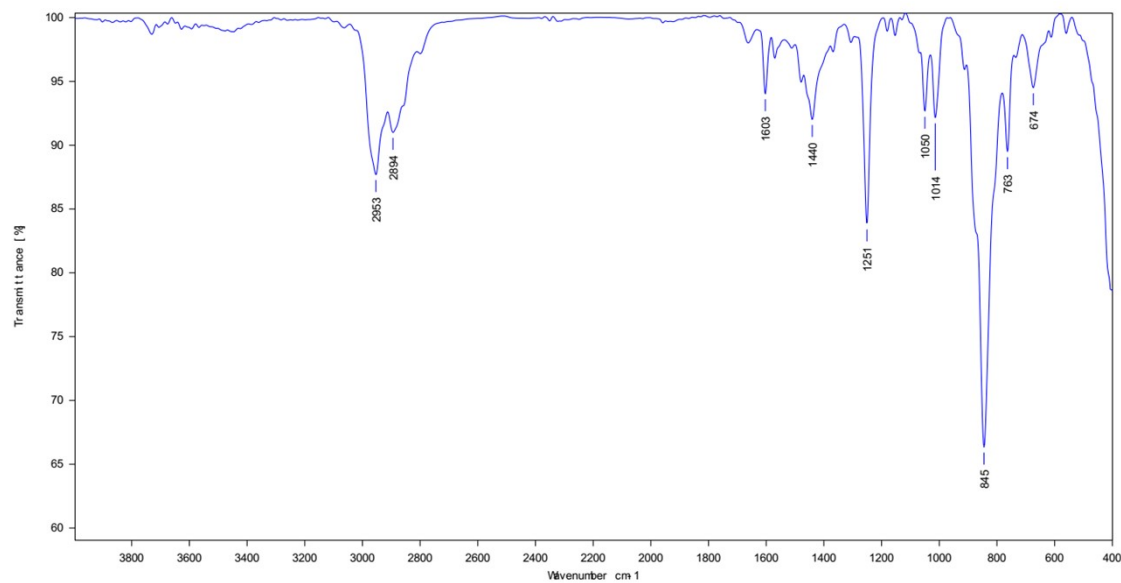

**Figure S50** IR spectrum of **4** in KBr pellet at room temperature.

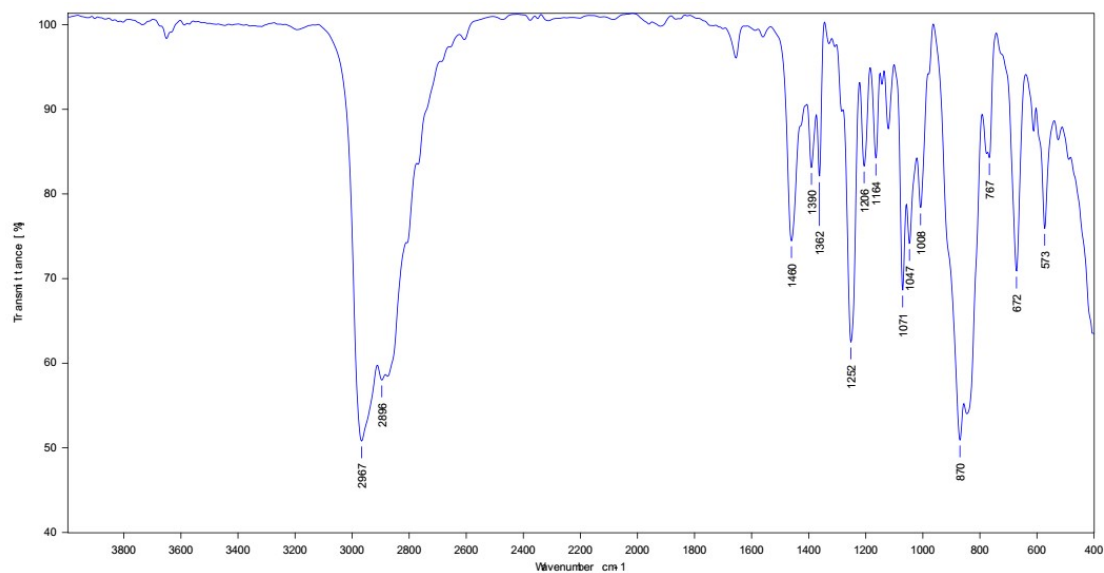

**Figure S51** IR spectrum of **5** in KBr pellet at room temperature.

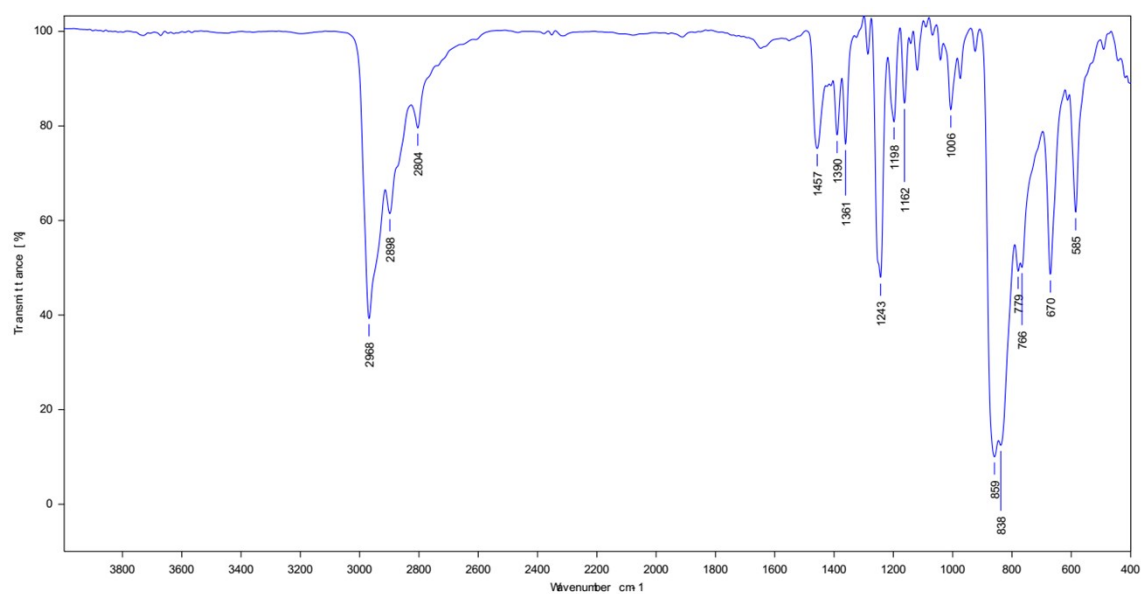

**Figure S52** IR spectrum of **6** in KBr pellet at room temperature.

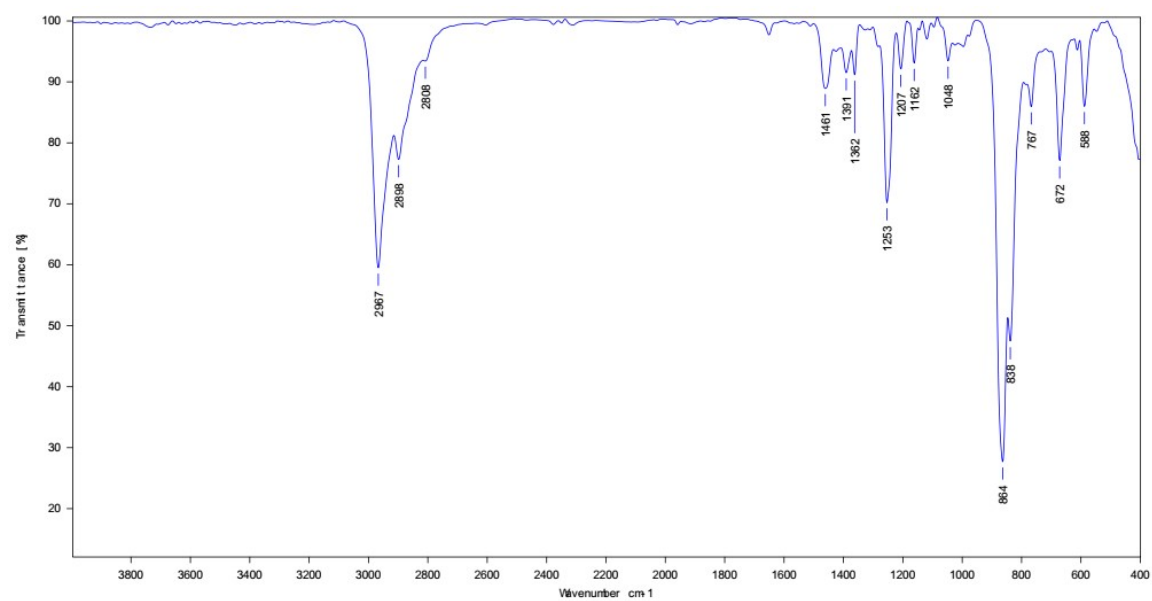

**Figure S53** IR spectrum of **7** in KBr pellet at room temperature.

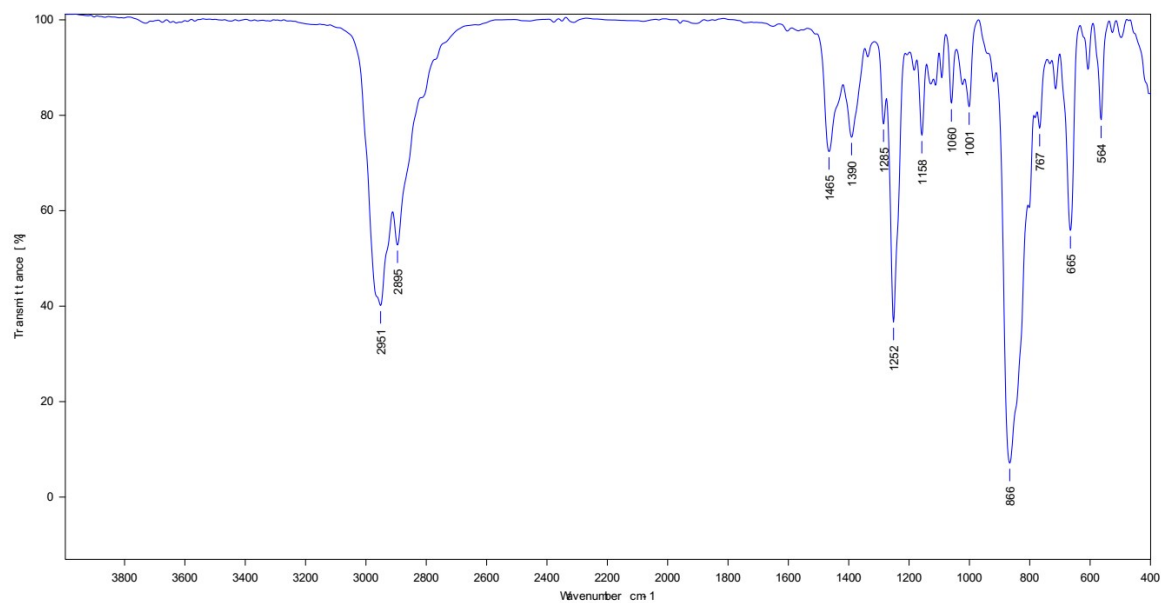

**Figure S54** IR spectrum of **8** in KBr pellet at room temperature.

## 5) References

- (1) X. H. He, Y. Z. Yao, X. Luo, J. Zhang, Y. Liu, L. Zhang and Q. Wu, *Organometallics*, 2003, **22**, 4952-4957.
